# Supplementary material for: IFN-γ-Stimulated Neutrophils Suppress Lymphocyte Proliferation through Expression of PD-L1
Source: PubMed Central journal article supplement (PMC3756078; doi:10.1371/journal.pone.0072249), 2013-08-28
Supplement: pone.0072249.s001.pdf [file pone.0072249.s001.pdf]

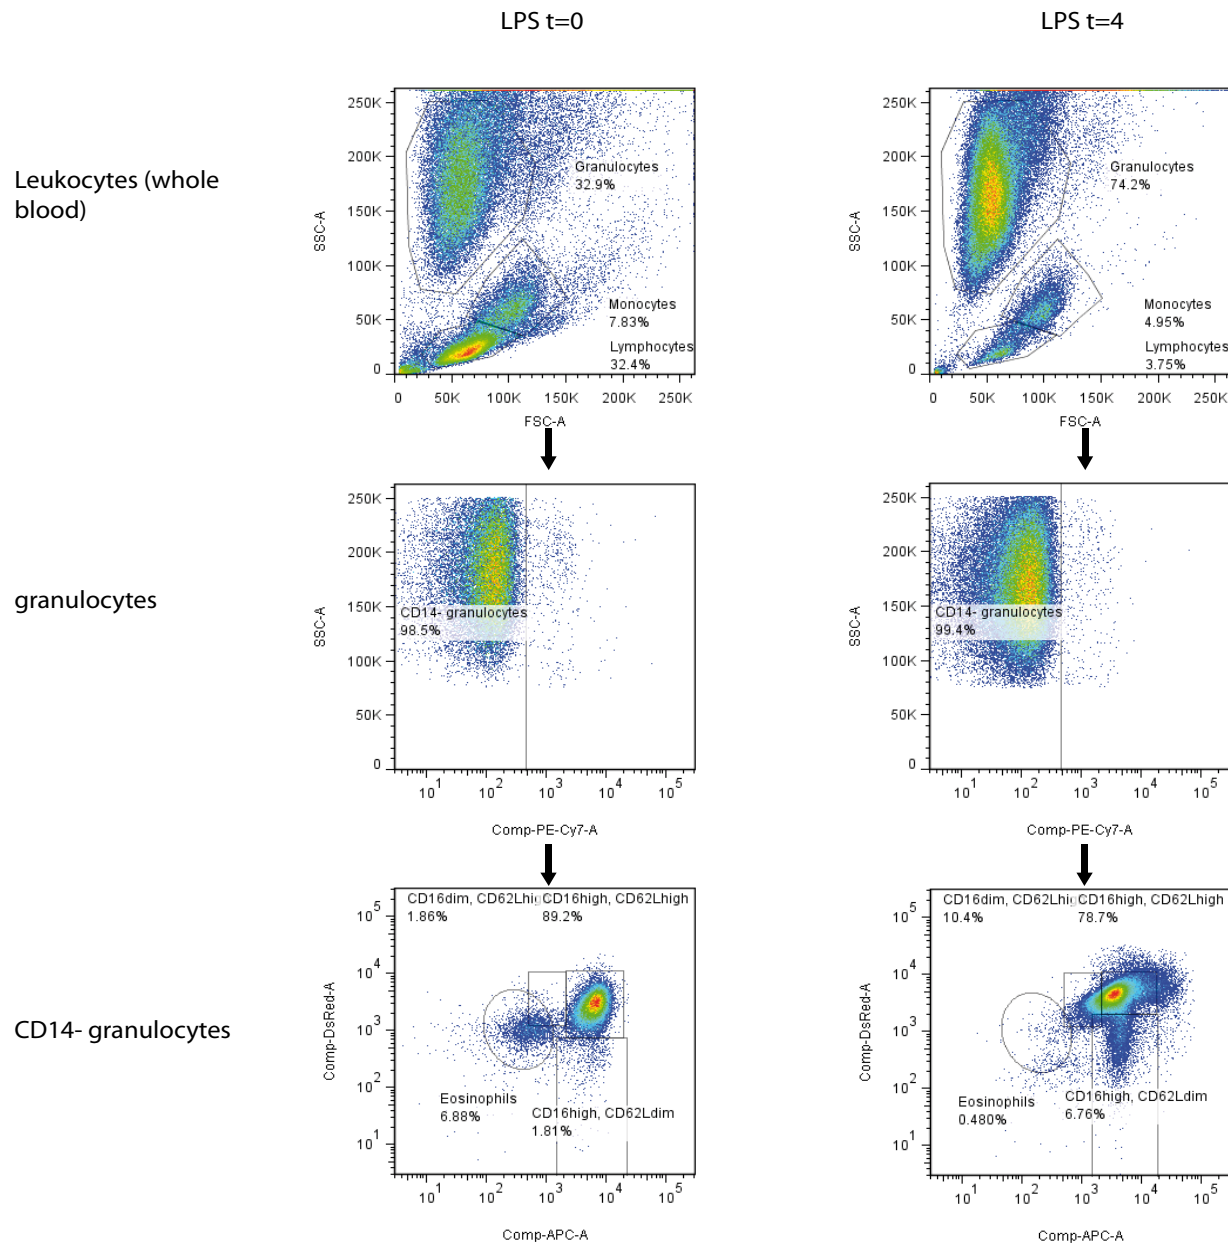

**Supplemental figure S1. FACS gating strategy of sorted neutrophil subsets.** Whole blood was shocked and labeled with antibodies. First, granulocytes were gated based on forward/sideward scatter (upper panels). Then CD14- granulocytes were selected (mid panels). Then neutrophil subsets were selected based on CD16 and CD62L expression (lower panels)
