# Supplementary material for: IFN-γ-Stimulated Neutrophils Suppress Lymphocyte Proliferation through Expression of PD-L1
Source: PubMed Central journal article supplement (PMC3756078; doi:10.1371/journal.pone.0072249), 2013-08-28
Supplement: pone.0072249.s002.pdf [file pone.0072249.s002.pdf]

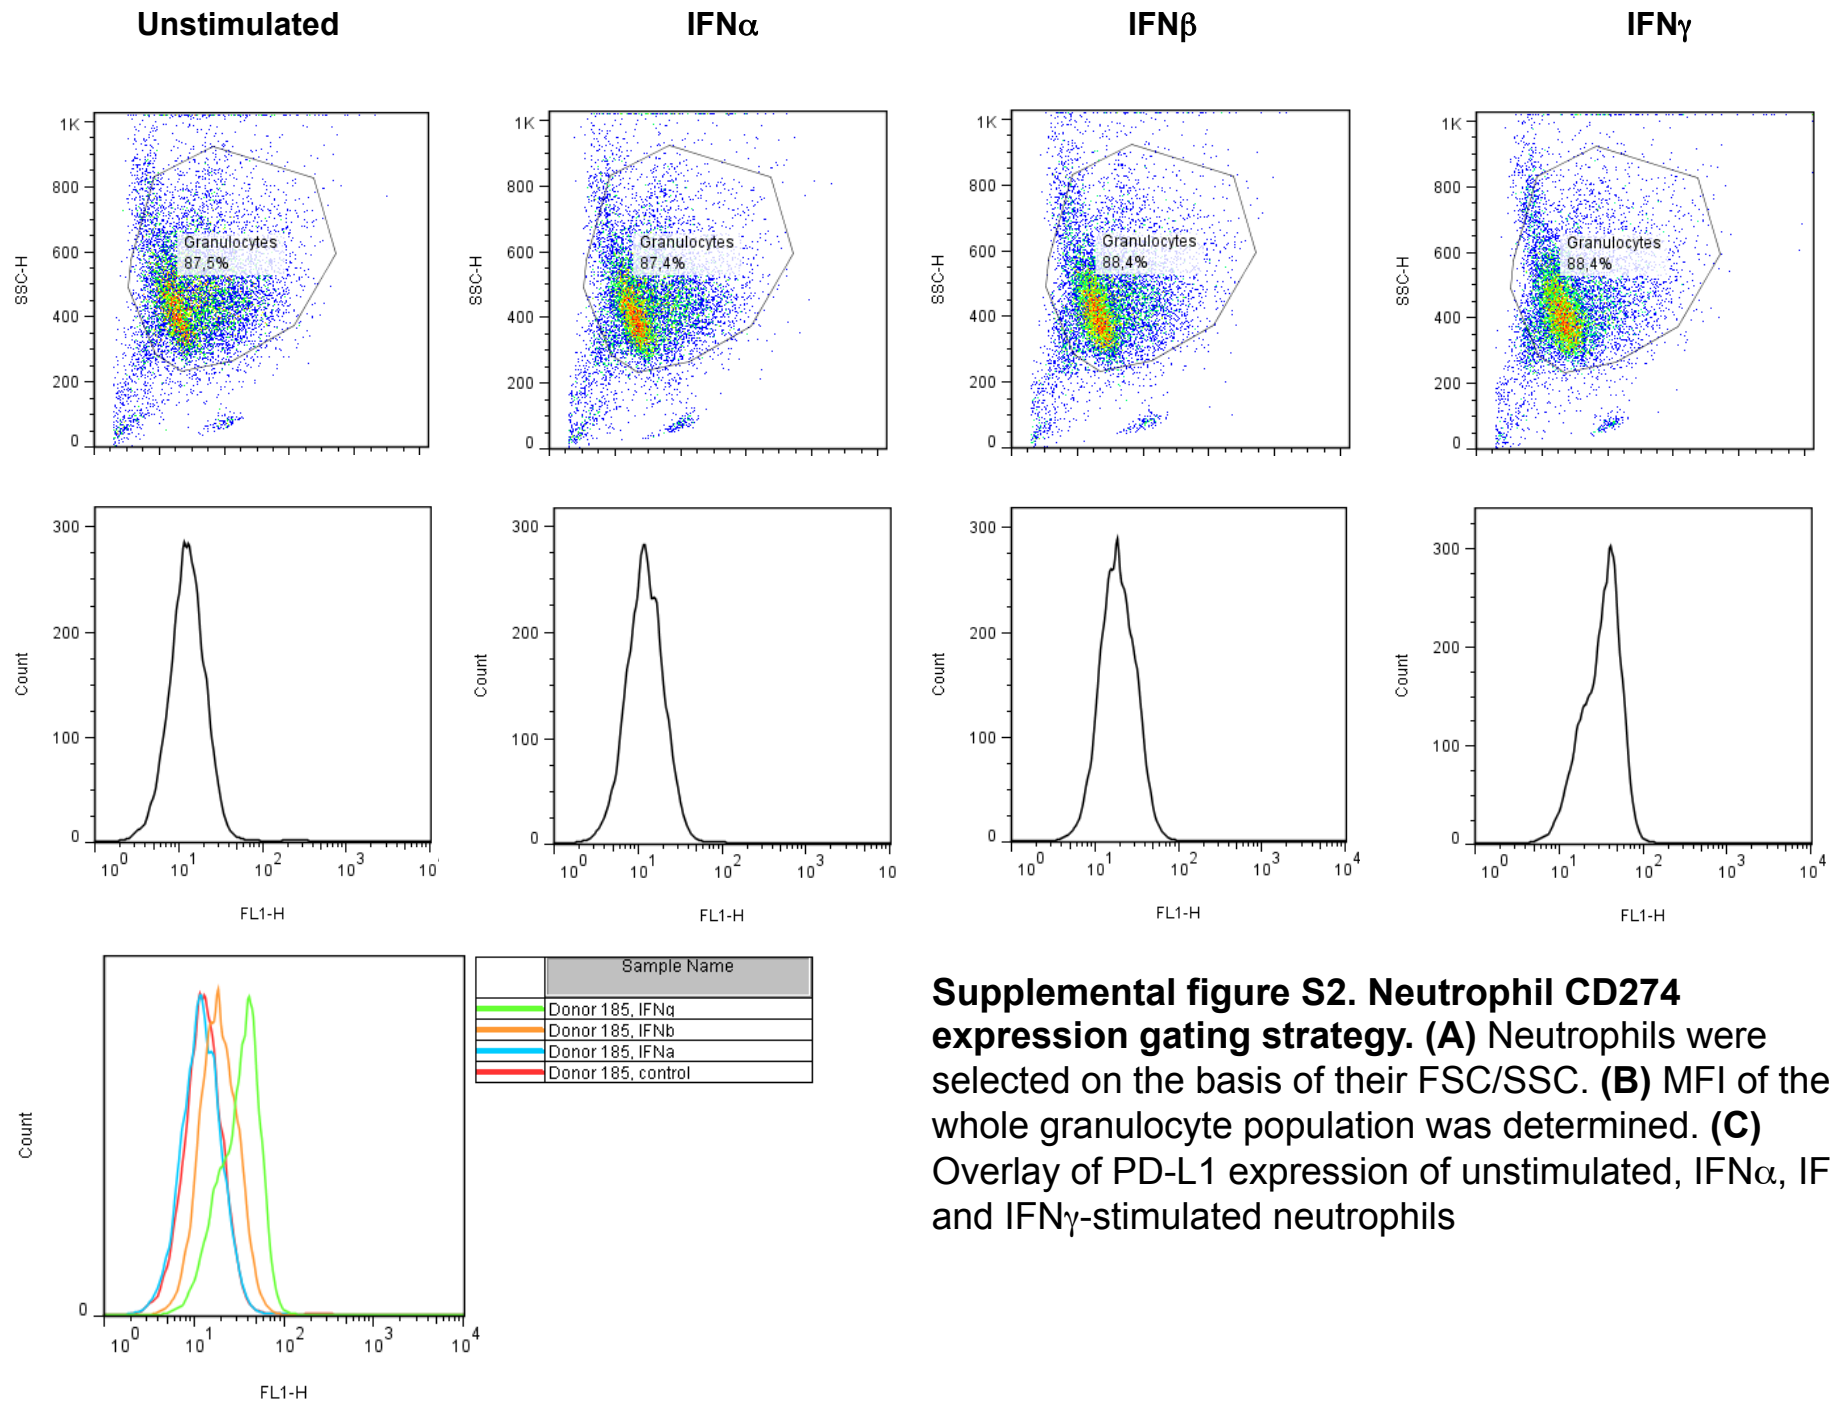

**Supplemental figure S2. Neutrophil CD274 expression gating strategy.** (A) Neutrophils were selected on the basis of their FSC/SSC. (B) MFI of the whole granulocyte population was determined. (C) Overlay of PD-L1 expression of unstimulated, IFN $\alpha$ , IFN $\beta$  and IFN $\gamma$ -stimulated neutrophils
