# Supplementary material for: IFN-γ-Stimulated Neutrophils Suppress Lymphocyte Proliferation through Expression of PD-L1
Source: PubMed Central journal article supplement (PMC3756078; doi:10.1371/journal.pone.0072249), 2013-08-28
Supplement: pone.0072249.s003.pdf [file pone.0072249.s003.pdf]

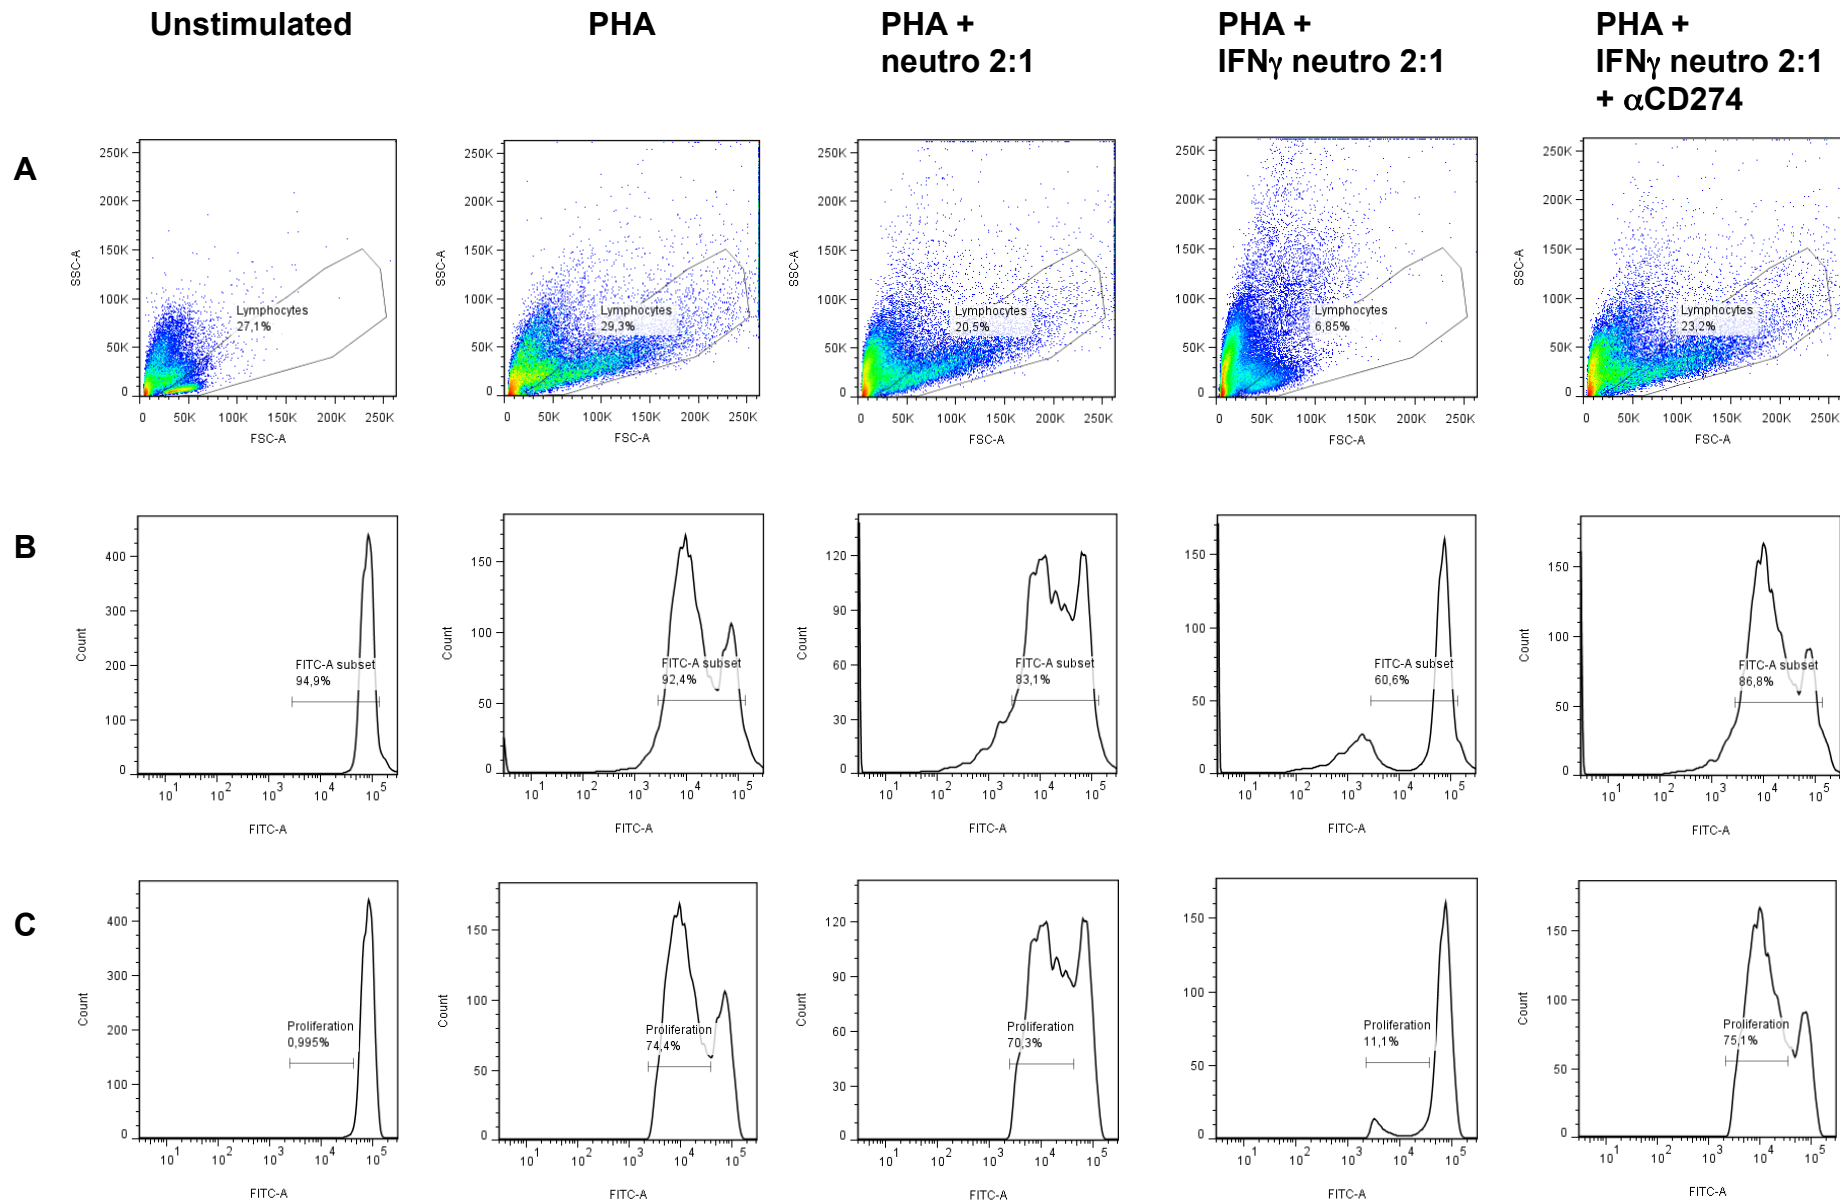

**Supplemental figure S3. Lymphocyte proliferation assay gating strategy.** (A) Lymphocytes were selected on the basis of their FSC/SSC. (B) FITC-positive events were selected based on the PHA-stimulated lymphocytes to exclude inclusion of apoptotic neutrophils. (C) The gate % proliferation was selected based on the unstimulated lymphocytes. All gates were identical in all samples within one experiment.
