# Supplementary material for: IFN-γ-Stimulated Neutrophils Suppress Lymphocyte Proliferation through Expression of PD-L1
Source: PubMed Central journal article supplement (PMC3756078; doi:10.1371/journal.pone.0072249), 2013-08-28
Supplement: pone.0072249.s004.pdf [file pone.0072249.s004.pdf]

A= CD16bright/CD62Lbright at t=0

B= CD16bright/CD62Lbright at t=4

C= CD16bright/CD62Ldim at t=4

D= CD16dim/CD62Lbright at t=4

| gene name | Fold change |       |       |       |
|-----------|-------------|-------|-------|-------|
|           | BvsA_       | CvsA_ | DvsA_ | CvsD_ |
| 37012     | 6.52        | 4.22  | 7.41  | -1.75 |
| 39875     | 16.78       | 15.28 | 10.86 | 1.41  |
| 39879     | -1.08       | -1.25 | -2.33 | 1.87  |
| 39880     | -2.03       | -2.65 | -2.77 | 1.05  |
| 40058     | 1.00        | -2.82 | -1.60 | -1.77 |
| 40063     | -1.04       | -1.65 | -3.05 | 1.85  |
| ABCA1     | 1.21        | 1.11  | -1.88 | 2.10  |
| ABCF1     | 1.44        | 2.12  | 1.24  | 1.71  |
| ABHD2     | -1.85       | -2.46 | -2.01 | -1.22 |
| ABHD3     | -1.66       | -1.95 | -2.90 | 1.49  |
| ABHD5     | -1.10       | -1.15 | -2.19 | 1.91  |
| ABTB1     | -1.62       | -1.83 | -2.17 | 1.18  |
| ACAP1     | 1.23        | -1.45 | 1.67  | -2.42 |
| ACAP2     | -1.30       | -1.62 | -2.07 | 1.28  |
| ACBD5     | -2.30       | -2.08 | -2.34 | 1.12  |
| ACER3     | 2.68        | 1.19  | 2.41  | -2.02 |
| ACLY      | -1.70       | -2.21 | -1.55 | -1.43 |
| ACN9      | 2.10        | 1.04  | 2.07  | -1.99 |
| ACOT13    | -2.30       | -1.75 | -3.38 | 1.94  |
| ACPP      | -2.59       | -3.50 | -2.51 | -1.40 |
| ACSL3     | 3.41        | 1.75  | 1.75  | -1.00 |
| ACSL4     | 2.27        | 1.30  | 1.17  | 1.12  |
| ACSL5     | 3.46        | 4.62  | 1.64  | 2.82  |
| ACVR1B    | 2.18        | 1.44  | 2.04  | -1.42 |
| ADAM10    | -1.87       | -1.86 | -2.74 | 1.47  |
| ADAM17    | 1.22        | 1.48  | -1.95 | 2.89  |
| ADAT1     | 2.04        | 1.83  | 1.77  | 1.03  |
| ADI1      | -1.62       | -2.00 | -1.79 | -1.12 |
| ADK       | -1.73       | -1.69 | -2.37 | 1.41  |
| ADM       | 2.01        | 2.40  | 1.40  | 1.72  |
| ADORA2A   | 1.74        | 3.00  | 1.75  | 1.71  |
| ADRBK2    | 1.48        | 2.55  | -1.38 | 3.51  |
| ADSS      | -2.05       | -2.11 | -2.15 | 1.02  |
| AGFG1     | 2.01        | 1.32  | 2.18  | -1.65 |
| AGL       | 1.20        | -1.29 | 1.66  | -2.15 |
| AGPAT6    | 3.12        | 2.40  | 2.18  | 1.10  |
| AHSA2     | -1.44       | -1.69 | -2.07 | 1.23  |
| AIF1      | -2.18       | -1.39 | -3.47 | 2.50  |
| AIM2      | 1.57        | 1.39  | -1.99 | 2.76  |
| AK2       | 1.41        | 1.68  | -1.46 | 2.46  |
| AKAP8L    | -2.12       | -2.27 | -1.86 | -1.22 |
| AKT1      | -2.28       | -2.70 | -2.67 | -1.01 |
| AKTIP     | -1.87       | -3.19 | -1.24 | -2.58 |

|          |       |       |        |       |
|----------|-------|-------|--------|-------|
| ALCAM    | -1.51 | 1.24  | -2.66  | 3.29  |
| ALDH2    | 3.83  | 2.57  | 2.05   | 1.26  |
| ALDH9A1  | -1.73 | -1.69 | -2.62  | 1.55  |
| ALKBH5   | -2.06 | -2.06 | -1.68  | -1.22 |
| AMACR    | -1.87 | -2.08 | -1.88  | -1.11 |
| AMBRA1   | -1.69 | -1.87 | -2.08  | 1.11  |
| AMD1     | -2.73 | -2.78 | -3.94  | 1.42  |
| AMPD2    | -4.95 | -3.42 | -5.11  | 1.50  |
| AMY2B    | -1.29 | -1.71 | -2.49  | 1.46  |
| AMZ2     | -2.05 | -2.50 | -2.06  | -1.21 |
| ANAPC13  | -6.86 | -4.13 | -10.50 | 2.54  |
| ANKRD12  | 1.93  | 1.89  | -1.16  | 2.19  |
| ANKRD22  | 11.16 | 8.69  | 7.34   | 1.19  |
| ANKRD32  | -1.70 | -2.17 | -2.04  | -1.06 |
| ANKRD36B | 1.71  | 1.55  | 2.79   | -1.81 |
| ANKRD44  | -1.30 | -1.67 | -2.19  | 1.31  |
| ANKRD55  | 2.34  | 1.41  | 2.13   | -1.51 |
| ANXA1    | 1.51  | -1.14 | 2.42   | -2.77 |
| ANXA3    | 3.94  | 2.80  | 2.79   | 1.01  |
| ANXA7    | 1.42  | 1.86  | -1.37  | 2.56  |
| AOC2     | -2.29 | -2.10 | -2.41  | 1.15  |
| AOC3     | -2.69 | -2.25 | -2.63  | 1.17  |
| AP1M1    | -1.73 | -2.60 | -1.20  | -2.17 |
| AP2M1    | -1.62 | -2.09 | -1.63  | -1.28 |
| AP3B1    | -1.32 | -1.79 | -2.55  | 1.42  |
| AP3M1    | -2.47 | -2.81 | -2.02  | -1.39 |
| APAF1    | -1.32 | -2.08 | -1.40  | -1.49 |
| APC      | -1.52 | -1.66 | -2.34  | 1.41  |
| APOBEC3B | -1.32 | 1.36  | -2.09  | 2.84  |
| APOL1    | 1.28  | 1.41  | -1.70  | 2.41  |
| APOL2    | 1.13  | 1.32  | -1.56  | 2.06  |
| APOL6    | 2.16  | 2.19  | 1.15   | 1.90  |
| APPBP2   | -1.36 | -1.29 | -2.21  | 1.71  |
| APPL2    | -2.18 | -2.76 | -2.13  | -1.30 |
| AQR      | -2.23 | -2.74 | -2.00  | -1.37 |
| ARAP2    | 3.70  | 3.06  | 1.94   | 1.58  |
| ARAP3    | -1.85 | -2.18 | -2.28  | 1.04  |
| ARFIP1   | -1.29 | 1.12  | -3.33  | 3.74  |
| ARG1     | 1.98  | -1.40 | 3.54   | -4.96 |
| ARHGAP15 | 1.04  | -1.12 | -2.09  | 1.86  |
| ARHGAP19 | -2.72 | -4.12 | -2.16  | -1.91 |
| ARHGAP24 | 2.04  | 1.27  | 1.44   | -1.13 |
| ARHGAP25 | -2.51 | -1.83 | -3.00  | 1.64  |
| ARID3B   | -1.63 | -2.15 | -1.48  | -1.45 |
| ARID4A   | 1.00  | -1.40 | -2.11  | 1.50  |
| ARID4B   | 1.81  | 1.61  | -1.68  | 2.71  |
| ARID5A   | 2.47  | 2.02  | 1.92   | 1.05  |
| ARL2BP   | -2.45 | -2.59 | -2.07  | -1.25 |
| ARL5B    | 3.23  | 3.89  | 1.46   | 2.66  |
| ARL6IP1  | -2.59 | -2.64 | -1.99  | -1.33 |

|          |       |       |        |       |
|----------|-------|-------|--------|-------|
| ARNT     | -1.49 | -2.10 | -1.40  | -1.50 |
| ARNTL    | -1.40 | -1.80 | -2.26  | 1.25  |
| ARPP19   | -2.27 | -2.81 | -2.65  | -1.06 |
| ARRB1    | -2.76 | -1.24 | -6.33  | 5.12  |
| ARRDC3   | -1.56 | -1.42 | -2.85  | 2.01  |
| ARSB     | 1.90  | 2.95  | 1.15   | 2.57  |
| ARSG     | -1.62 | -1.71 | -2.14  | 1.26  |
| ASF1B    | -3.75 | -2.71 | -5.31  | 1.96  |
| ASH2L    | -1.76 | -2.05 | -1.67  | -1.23 |
| ASPH     | -1.62 | -2.01 | -2.03  | 1.01  |
| ATAD2B   | 2.09  | -1.06 | 1.01   | -1.08 |
| ATE1     | -1.73 | -2.25 | -1.63  | -1.38 |
| ATF7IP   | -2.26 | -2.40 | -2.18  | -1.10 |
| ATG2B    | -1.73 | -2.16 | -2.07  | -1.04 |
| ATG7     | 2.69  | 3.73  | 1.06   | 3.52  |
| ATHL1    | -1.92 | -1.28 | -2.83  | 2.21  |
| ATL2     | -1.65 | -1.86 | -2.07  | 1.11  |
| ATMIN    | -3.14 | -2.89 | -2.23  | -1.30 |
| ATP11B   | 2.08  | 1.02  | 1.53   | -1.50 |
| ATP13A3  | 1.87  | 2.35  | 1.00   | 2.34  |
| ATP1A1   | -2.10 | 1.04  | -3.13  | 3.24  |
| ATP2B1   | -4.87 | -1.65 | -11.02 | 6.68  |
| ATP2B4   | -1.25 | -2.06 | -1.48  | -1.39 |
| ATP2C2   | 2.12  | 1.42  | 2.95   | -2.08 |
| ATP5B    | -1.88 | -2.03 | -1.45  | -1.40 |
| ATP5L    | -1.66 | -2.01 | -2.03  | 1.01  |
| ATP6V0E1 | 1.27  | -1.38 | -2.22  | 1.61  |
| ATP6V1A  | -2.79 | -2.15 | -4.53  | 2.11  |
| ATP6V1C1 | 2.30  | 1.71  | -1.03  | 1.76  |
| ATP6V1D  | -1.48 | -1.41 | -2.02  | 1.43  |
| ATP6V1G1 | -1.44 | -1.06 | -2.11  | 1.99  |
| ATP7A    | -2.92 | -3.12 | -3.21  | 1.03  |
| AVIL     | -1.45 | -1.31 | -2.40  | 1.83  |
| AZI2     | 2.14  | 1.50  | 1.43   | 1.05  |
| AZIN1    | 2.93  | 3.32  | 1.59   | 2.09  |
| B3GNT5   | 4.04  | 3.69  | 1.97   | 1.87  |
| B4GALT5  | 2.12  | 2.03  | 1.79   | 1.13  |
| BACH1    | -1.15 | 1.15  | -1.95  | 2.24  |
| BAG5     | -2.05 | -1.76 | -1.82  | 1.03  |
| BAT1     | -1.45 | -1.97 | -2.72  | 1.38  |
| BAT2L    | -1.75 | -2.29 | -1.73  | -1.32 |
| BATF     | 2.99  | 3.11  | 2.16   | 1.44  |
| BATF3    | 1.83  | 2.01  | 1.41   | 1.42  |
| BAZ2B    | -1.36 | -1.93 | -2.65  | 1.37  |
| BBX      | -1.23 | -1.77 | -2.04  | 1.15  |
| BCKDK    | -1.92 | -1.45 | -2.13  | 1.47  |
| BCL2L11  | 1.77  | 2.01  | -1.57  | 3.15  |
| BCLAF1   | 1.04  | -1.18 | -2.33  | 1.98  |
| BET1L    | -2.04 | -2.10 | -2.06  | -1.02 |
| BHLHE40  | -2.20 | 1.01  | -3.39  | 3.42  |

|           |       |       |       |       |
|-----------|-------|-------|-------|-------|
| BICD2     | -2.65 | -2.98 | -2.13 | -1.40 |
| BIRC3     | 4.15  | 4.16  | 1.75  | 2.38  |
| BMP2K     | -1.03 | -1.60 | -2.18 | 1.37  |
| BMX       | 1.30  | -1.65 | 2.02  | -3.33 |
| BOD1L     | -1.40 | -1.57 | -2.47 | 1.57  |
| BPI       | 2.49  | 1.50  | 5.30  | -3.53 |
| BRCC3     | -3.02 | -3.60 | -2.38 | -1.51 |
| BRI3BP    | -2.42 | -2.15 | -2.13 | -1.01 |
| BRP44     | -2.21 | -2.31 | -2.70 | 1.17  |
| BRWD1     | -2.02 | -2.10 | -2.59 | 1.23  |
| BTBD1     | -1.69 | -2.03 | -1.67 | -1.22 |
| BTF3L4    | -3.50 | -3.29 | -3.31 | 1.01  |
| BTK       | -1.48 | -2.60 | -1.36 | -1.91 |
| BTN2A1    | -1.30 | -1.12 | -2.28 | 2.04  |
| BTN2A2    | 1.04  | 1.56  | -1.60 | 2.50  |
| BTN3A1    | -2.15 | -1.70 | -3.60 | 2.13  |
| BTN3A2    | -2.46 | -1.71 | -4.64 | 2.71  |
| BTN3A3    | -2.12 | -1.56 | -3.15 | 2.02  |
| BUB3      | -2.00 | -2.10 | -1.90 | -1.11 |
| BXDC1     | -1.14 | 2.56  | -1.22 | 3.11  |
| C10orf11  | -2.31 | -2.94 | -2.94 | -1.00 |
| C10orf119 | -1.65 | -1.68 | -2.08 | 1.23  |
| C10orf137 | -1.89 | -2.03 | -2.10 | 1.04  |
| C10orf55  | 1.38  | 2.60  | 1.26  | 2.06  |
| C10orf57  | 1.20  | -1.29 | 2.02  | -2.61 |
| C11orf51  | 1.14  | -1.41 | 1.52  | -2.14 |
| C11orf54  | -1.83 | -2.27 | -2.30 | 1.01  |
| C11orf75  | 2.38  | 3.86  | -1.01 | 3.90  |
| C11orf82  | 1.05  | -1.27 | 1.75  | -2.22 |
| C12orf35  | -1.25 | -1.26 | -2.62 | 2.07  |
| C12orf4   | 2.99  | 2.32  | 1.82  | 1.27  |
| C12orf5   | -2.92 | -2.91 | -2.43 | -1.20 |
| C13orf23  | 5.19  | 1.71  | 5.14  | -3.01 |
| C13orf31  | 2.77  | 2.10  | 1.51  | 1.39  |
| C14orf101 | 2.91  | 1.74  | 2.29  | -1.32 |
| C14orf106 | -2.51 | -2.86 | -3.13 | 1.10  |
| C14orf129 | -1.93 | -2.93 | -1.78 | -1.65 |
| C14orf135 | -2.20 | -2.40 | -2.24 | -1.07 |
| C14orf156 | -2.71 | -2.84 | -2.27 | -1.25 |
| C14orf159 | -2.00 | -1.71 | -3.30 | 1.92  |
| C14orf2   | -1.35 | -2.12 | -1.46 | -1.45 |
| C15orf24  | -2.23 | -2.00 | -2.38 | 1.19  |
| C15orf48  | 1.37  | 4.29  | 1.11  | 3.86  |
| C16orf54  | -2.18 | -2.73 | -1.80 | -1.52 |
| C16orf61  | -1.85 | -1.63 | -2.01 | 1.23  |
| C16orf63  | -2.13 | -2.06 | -2.37 | 1.15  |
| C16orf70  | -2.20 | -2.59 | -1.79 | -1.45 |
| C16orf80  | -1.93 | -1.89 | -2.03 | 1.08  |
| C17orf63  | 2.57  | 2.42  | 1.73  | 1.39  |
| C17orf65  | -1.97 | -2.49 | -1.78 | -1.40 |

|           |       |       |       |       |
|-----------|-------|-------|-------|-------|
| C18orf25  | -1.30 | -1.59 | -2.09 | 1.31  |
| C18orf8   | -2.16 | -2.18 | -2.05 | -1.07 |
| C19orf42  | -2.18 | -2.41 | -2.08 | -1.16 |
| C19orf59  | 2.65  | 1.64  | 2.43  | -1.48 |
| C19orf61  | 2.72  | 2.92  | 1.41  | 2.07  |
| C1orf103  | -1.05 | 1.20  | -2.58 | 3.09  |
| C1orf128  | -2.06 | -2.35 | -2.25 | -1.04 |
| C1orf162  | 1.16  | -1.68 | 2.21  | -3.73 |
| C1orf183  | -4.00 | -3.73 | -4.07 | 1.09  |
| C1orf27   | 1.11  | 1.13  | -1.93 | 2.17  |
| C1orf43   | -1.68 | -1.17 | -2.82 | 2.41  |
| C1orf55   | -2.31 | -1.49 | -3.00 | 2.02  |
| C20orf11  | -1.98 | -2.00 | -2.12 | 1.06  |
| C20orf111 | -1.18 | -1.19 | -2.35 | 1.98  |
| C20orf112 | -1.48 | -1.45 | -2.00 | 1.38  |
| C20orf177 | -1.14 | -2.09 | 1.09  | -2.27 |
| C20orf19  | -2.27 | -2.81 | -2.65 | -1.06 |
| C20orf20  | -2.14 | -1.90 | -2.07 | 1.09  |
| C20orf72  | -2.56 | -2.18 | -2.18 | -1.00 |
| C20orf74  | 2.13  | 1.56  | 1.71  | -1.09 |
| C21orf91  | 3.21  | 3.49  | 1.44  | 2.41  |
| C22orf28  | 1.26  | -1.62 | 1.54  | -2.49 |
| C22orf30  | -1.89 | -2.04 | -1.95 | -1.05 |
| C22orf9   | -1.27 | -1.84 | 1.09  | -2.00 |
| C2CD2L    | -2.93 | -2.47 | -2.33 | -1.06 |
| C2orf24   | -2.65 | -3.40 | -1.64 | -2.07 |
| C3        | 3.26  | 7.77  | 2.07  | 3.75  |
| C3AR1     | 8.22  | 9.67  | 6.28  | 1.54  |
| C3orf17   | -1.36 | -1.31 | -2.09 | 1.60  |
| C3orf34   | -2.18 | -1.80 | -4.07 | 2.26  |
| C3orf62   | -2.14 | -1.89 | -3.02 | 1.60  |
| C3orf63   | -1.57 | -2.50 | -2.00 | -1.25 |
| C4BPA     | 1.52  | 1.25  | -1.72 | 2.15  |
| C4orf14   | -2.15 | -1.98 | -2.09 | 1.05  |
| C4orf16   | 2.39  | 1.86  | 1.48  | 1.26  |
| C4orf29   | -1.47 | -1.59 | -2.62 | 1.64  |
| C4orf3    | 2.47  | 1.39  | -1.82 | 2.52  |
| C4orf33   | -2.06 | -1.73 | -2.48 | 1.43  |
| C4orf41   | -1.46 | -2.01 | -1.78 | -1.13 |
| C5AR1     | -2.28 | -2.60 | -1.73 | -1.50 |
| C5orf32   | 2.49  | 1.93  | 1.80  | 1.07  |
| C5orf36   | -1.51 | -2.00 | -2.69 | 1.34  |
| C5orf41   | 1.10  | 1.17  | -2.14 | 2.50  |
| C6orf115  | -2.08 | -2.04 | -2.59 | 1.27  |
| C6orf150  | 5.59  | 4.39  | 2.21  | 1.99  |
| C6orf204  | -3.37 | -4.05 | -4.42 | 1.09  |
| C6orf211  | 1.72  | 1.74  | -1.24 | 2.15  |
| C6orf62   | -1.11 | 1.09  | -2.22 | 2.42  |
| C6orf72   | -2.33 | -2.36 | -4.84 | 2.06  |
| C7orf23   | -3.32 | -3.20 | -3.59 | 1.12  |

|           |       |       |       |       |
|-----------|-------|-------|-------|-------|
| C7orf25   | -2.18 | -2.91 | -2.23 | -1.31 |
| C7orf41   | -1.77 | -2.05 | -2.17 | 1.06  |
| C7orf43   | -2.73 | -2.90 | -2.39 | -1.21 |
| C7orf44   | -1.58 | -2.07 | -2.36 | 1.14  |
| C7orf60   | 1.06  | 1.21  | -2.08 | 2.52  |
| C7orf70   | -2.04 | -1.50 | -1.99 | 1.33  |
| C9orf72   | 1.15  | 1.14  | -2.30 | 2.61  |
| C9orf91   | -1.46 | 1.71  | -1.77 | 3.02  |
| CABC1     | -2.27 | -2.08 | -2.42 | 1.17  |
| CACNB4    | -2.34 | -1.86 | -2.42 | 1.30  |
| CALM2     | -2.06 | -2.58 | -4.62 | 1.79  |
| CAMK1G    | 1.82  | 2.03  | 1.27  | 1.61  |
| CAMK2G    | -2.79 | -3.76 | -2.41 | -1.56 |
| CAMKK2    | -2.48 | -3.01 | -2.20 | -1.37 |
| CAPG      | 1.76  | 1.16  | 2.37  | -2.06 |
| CAPN1     | -1.00 | -1.60 | 1.26  | -2.02 |
| CAPN7     | -2.03 | -2.55 | -2.80 | 1.10  |
| CAPNS1    | -1.14 | -1.78 | 1.24  | -2.22 |
| CAPZA2    | -1.05 | -1.01 | -2.04 | 2.02  |
| CARD8     | -1.73 | -1.77 | -2.03 | 1.15  |
| CARHSP1   | -1.99 | -2.72 | -1.59 | -1.71 |
| CASP1     | 1.37  | 1.42  | -1.74 | 2.46  |
| CASP10    | 1.96  | 3.04  | -1.12 | 3.39  |
| CASP2     | -1.71 | -2.41 | -1.49 | -1.62 |
| CASP5     | 2.05  | 3.47  | -1.75 | 6.07  |
| CASP8     | -1.64 | -1.60 | -2.38 | 1.49  |
| CASS4     | -4.12 | -1.82 | -6.51 | 3.57  |
| CBFB      | -1.78 | -2.11 | -1.59 | -1.32 |
| CBWD3     | -1.36 | -1.86 | -2.30 | 1.24  |
| CBX3      | 1.13  | -1.46 | -2.07 | 1.42  |
| CBX7      | -2.31 | -2.64 | -2.75 | 1.04  |
| CCBL2     | 1.33  | 1.09  | -1.88 | 2.06  |
| CCDC109A  | -1.70 | -2.37 | -2.16 | -1.10 |
| CCDC125   | -2.99 | -3.52 | -2.81 | -1.25 |
| CCDC144NL | -1.64 | -2.24 | -1.80 | -1.24 |
| CCDC146   | -2.01 | -2.02 | -3.79 | 1.88  |
| CCDC69    | -1.71 | -2.06 | -1.98 | -1.04 |
| CCDC84    | -2.07 | -1.76 | -1.97 | 1.12  |
| CCL20     | 1.87  | 2.40  | 1.30  | 1.84  |
| CCL23     | 1.16  | 2.73  | 1.10  | 2.49  |
| CCL4      | 1.60  | 4.69  | 1.11  | 4.23  |
| CCM2      | -2.04 | -2.44 | -1.96 | -1.25 |
| CCNL1     | 1.99  | 2.16  | 1.03  | 2.10  |
| CCNY      | -1.92 | -1.75 | -2.41 | 1.38  |
| CCPG1     | -2.13 | -2.83 | -2.35 | -1.21 |
| CCR1      | 1.41  | 1.76  | -1.73 | 3.04  |
| CCR3      | -4.81 | -2.89 | -5.42 | 1.87  |
| CCRL2     | 2.65  | 7.63  | 1.39  | 5.48  |
| CD14      | 2.05  | 1.90  | 1.61  | 1.18  |
| CD177     | 7.48  | 3.66  | 16.15 | -4.41 |

|         |       |       |        |       |
|---------|-------|-------|--------|-------|
| CD24    | 1.99  | 1.84  | 2.72   | -1.48 |
| CD27    | -1.93 | -2.46 | -2.20  | -1.12 |
| CD274   | 5.28  | 9.03  | -1.08  | 9.74  |
| CD300A  | -3.13 | -1.98 | -3.85  | 1.94  |
| CD300LB | -3.94 | -3.60 | -3.96  | 1.10  |
| CD300LF | -2.99 | -3.04 | -2.53  | -1.20 |
| CD33    | -2.41 | -2.36 | -2.21  | -1.07 |
| CD3D    | -2.26 | -2.45 | -2.58  | 1.05  |
| CD3E    | -2.46 | -3.13 | -3.20  | 1.02  |
| CD3G    | -4.13 | -4.86 | -4.69  | -1.04 |
| CD4     | -2.39 | -1.66 | -2.34  | 1.41  |
| CD40    | 1.72  | 2.09  | 1.20   | 1.74  |
| CD44    | 3.39  | 3.25  | 2.80   | 1.16  |
| CD46    | -1.22 | -1.38 | -2.36  | 1.71  |
| CD47    | -1.77 | -1.86 | -2.62  | 1.41  |
| CD48    | 2.98  | 3.22  | 2.17   | 1.48  |
| CD52    | -2.31 | -2.65 | -2.34  | -1.13 |
| CD59    | 2.24  | 1.82  | 1.68   | 1.08  |
| CD68    | -1.70 | -1.40 | -2.42  | 1.73  |
| CD69    | 2.55  | 9.22  | 1.22   | 7.54  |
| CD74    | -1.55 | -1.13 | -2.26  | 1.99  |
| CD83    | 1.24  | 2.54  | 1.00   | 2.53  |
| CD84    | -1.69 | 1.67  | -1.63  | 2.71  |
| CD93    | -2.63 | -2.43 | -2.63  | 1.08  |
| CD96    | -1.95 | -2.23 | -2.25  | 1.01  |
| CDADC1  | 4.25  | 1.90  | 3.54   | -1.87 |
| CDC2L5  | -1.71 | -2.06 | -1.77  | -1.16 |
| CDC2L6  | -1.63 | -2.29 | -2.18  | -1.05 |
| CDC40   | -2.10 | -2.49 | -1.78  | -1.40 |
| CDKL5   | -1.61 | -2.39 | -1.71  | -1.40 |
| CDKN1A  | 1.84  | 2.81  | 1.11   | 2.53  |
| CDKN1B  | -1.85 | -1.87 | -2.17  | 1.16  |
| CDS2    | -2.46 | -2.50 | -3.64  | 1.45  |
| CDV3    | -1.93 | -2.41 | -1.73  | -1.39 |
| CEACAM1 | 3.86  | 2.87  | 3.96   | -1.38 |
| CEP170  | -4.73 | -3.58 | -4.82  | 1.35  |
| CEP63   | -6.28 | -4.30 | -10.36 | 2.41  |
| CEP97   | -3.11 | -3.32 | -2.32  | -1.43 |
| CEPT1   | 2.19  | 2.04  | 1.33   | 1.54  |
| CFD     | -1.99 | -1.55 | -2.51  | 1.62  |
| CFL2    | 8.24  | 8.75  | 2.06   | 4.26  |
| CHCHD7  | 2.25  | 1.59  | 1.66   | -1.05 |
| CHD1    | 2.16  | 1.82  | -1.25  | 2.28  |
| CHD2    | 1.57  | 1.59  | -1.26  | 2.00  |
| CHD9    | -1.90 | -2.04 | -1.93  | -1.05 |
| CHI3L1  | -1.30 | -1.04 | -3.35  | 3.21  |
| CHI3L2  | 2.63  | 2.64  | 1.35   | 1.95  |
| CHMP1B  | -1.95 | -1.92 | -2.10  | 1.09  |
| CHMP5   | 1.10  | 1.20  | -1.76  | 2.11  |
| CHORDC1 | 2.06  | 1.30  | 1.99   | -1.53 |

|         |       |       |       |       |
|---------|-------|-------|-------|-------|
| CHPT1   | -1.23 | -2.02 | -1.06 | -1.90 |
| CHURC1  | -1.15 | -1.19 | -2.38 | 2.00  |
| CIDEB   | -3.12 | -4.36 | -3.15 | -1.39 |
| CIITA   | 1.19  | 2.30  | -1.08 | 2.49  |
| CIR1    | -1.13 | 1.09  | -3.03 | 3.30  |
| CIRBP   | -1.84 | -1.79 | -2.14 | 1.20  |
| CISH    | 3.40  | 3.93  | 2.37  | 1.65  |
| CITED2  | -1.94 | -1.65 | -2.24 | 1.35  |
| CLC     | 3.41  | 1.08  | 6.50  | -6.01 |
| CLCN4   | -1.67 | -1.21 | -2.21 | 1.83  |
| CLEC12A | -1.00 | -1.63 | 1.33  | -2.16 |
| CLEC2B  | -1.16 | 1.08  | -3.08 | 3.33  |
| CLEC4D  | 7.69  | 6.04  | 6.32  | -1.05 |
| CLEC5A  | 4.20  | 4.21  | 5.13  | -1.22 |
| CLEC7A  | -2.60 | -1.71 | -6.98 | 4.09  |
| CLEC9A  | -3.09 | -2.56 | -3.12 | 1.22  |
| CLIC4   | 21.26 | 23.42 | 11.02 | 2.13  |
| CLK1    | 1.04  | 1.00  | -2.31 | 2.32  |
| CLN6    | -3.19 | -2.25 | -3.14 | 1.40  |
| CLPP    | -2.41 | -2.44 | -2.37 | -1.03 |
| CMAH    | 2.41  | 1.83  | 1.60  | 1.15  |
| CMTM7   | -1.85 | -2.21 | -1.77 | -1.25 |
| CNIH4   | 3.05  | 1.89  | 2.06  | -1.09 |
| CNOT10  | -2.20 | -2.21 | -2.51 | 1.13  |
| CNOT6   | -1.24 | -2.01 | -1.48 | -1.36 |
| CNOT7   | -2.34 | -2.72 | -3.03 | 1.11  |
| COG1    | -2.17 | -2.26 | -2.10 | -1.07 |
| COMMD8  | -2.29 | -2.89 | -2.95 | 1.02  |
| COPS3   | -4.72 | -4.46 | -4.44 | -1.00 |
| COPS6   | -2.00 | -2.30 | -1.91 | -1.20 |
| COQ10B  | 1.08  | 1.12  | -1.84 | 2.06  |
| CORO1B  | -2.31 | -2.08 | -2.42 | 1.17  |
| CORO1C  | -3.01 | -3.63 | -3.52 | -1.03 |
| CP110   | -1.33 | -2.37 | -1.35 | -1.76 |
| CPEB2   | -2.46 | -2.50 | -3.06 | 1.22  |
| CPPED1  | -2.27 | -1.98 | -2.79 | 1.41  |
| CPT2    | -1.98 | -2.24 | -1.87 | -1.19 |
| CREB1   | -1.13 | -1.04 | -2.17 | 2.08  |
| CREBL2  | 1.27  | 2.60  | 1.05  | 2.48  |
| CREG1   | 1.11  | 1.47  | -1.74 | 2.56  |
| CRIPT   | -1.59 | -1.75 | -2.18 | 1.25  |
| CRISP3  | 6.98  | 2.80  | 16.92 | -6.04 |
| CRLF3   | -2.31 | -3.12 | -2.41 | -1.29 |
| CRTC3   | 2.43  | 1.45  | 2.76  | -1.90 |
| CSDA    | -2.05 | -1.36 | -3.18 | 2.34  |
| CSE1L   | -2.38 | -2.61 | -2.90 | 1.11  |
| CSF1R   | -1.91 | -1.68 | -2.91 | 1.73  |
| CSNK1G3 | -1.28 | -1.39 | -2.06 | 1.48  |
| CSNK2A1 | -1.77 | -2.20 | -1.29 | -1.71 |
| CSRNP1  | 2.54  | 2.96  | 1.43  | 2.07  |



|              |       |       |       |       |
|--------------|-------|-------|-------|-------|
| CSTA         | 1.50  | 1.35  | -1.78 | 2.40  |
| CSTF1        | -1.67 | -1.44 | -2.07 | 1.43  |
| CTBS         | -1.24 | -1.31 | -2.24 | 1.71  |
| CTCF         | -3.06 | -2.91 | -2.54 | -1.14 |
| CTD-2514C3.1 | 1.73  | 1.69  | 2.05  | -1.21 |
| CTDSPL2      | -2.16 | -2.22 | -3.40 | 1.53  |
| CTSC         | -3.03 | -1.86 | -4.28 | 2.30  |
| CTSH         | 10.42 | 6.13  | 11.07 | -1.80 |
| CUGBP2       | -1.65 | -2.11 | -1.73 | -1.22 |
| CUL4B        | -1.23 | -1.68 | -2.04 | 1.21  |
| CX3CR1       | -1.18 | -1.25 | -2.27 | 1.82  |
| CXCL10       | 6.96  | 33.78 | 2.29  | 14.74 |
| CXCL11       | 1.28  | 2.67  | 1.26  | 2.11  |
| CXCL16       | 1.24  | 1.57  | -1.36 | 2.13  |
| CXCR4        | -4.14 | -1.68 | -2.59 | 1.54  |
| CXorf21      | 1.44  | 1.68  | -1.98 | 3.33  |
| CXorf38      | -1.68 | -1.40 | -2.64 | 1.89  |
| CYB5B        | -1.76 | -2.50 | -1.37 | -1.83 |
| CYB5D1       | 2.23  | 1.70  | 1.64  | 1.04  |
| CYB5R4       | -1.01 | -1.05 | -2.13 | 2.03  |
| CYBB         | 2.96  | 3.10  | 3.32  | -1.07 |
| CYBRD1       | -2.53 | -3.04 | -4.20 | 1.38  |
| CYP27A1      | -1.37 | 1.15  | -3.34 | 3.83  |
| CYSLTR1      | -2.75 | -2.40 | -3.98 | 1.66  |
| CY TSA       | 3.69  | 1.80  | 3.51  | -1.95 |
| DAD1         | -2.15 | -2.38 | -1.88 | -1.27 |
| DAP          | -1.63 | -1.32 | -2.41 | 1.82  |
| DAPK1        | -1.79 | -1.49 | -2.44 | 1.64  |
| DAPP1        | 2.13  | 2.21  | -1.38 | 3.05  |
| DCAF16       | -1.70 | -1.81 | -2.09 | 1.16  |
| DCAF5        | -1.55 | -2.13 | -1.37 | -1.56 |
| DCAF7        | -1.96 | -2.05 | -1.50 | -1.36 |
| DCUN1D3      | 3.75  | 4.30  | 2.18  | 1.97  |
| DDIT3        | -1.72 | -1.59 | -2.35 | 1.47  |
| DDX20        | -2.45 | -2.38 | -2.27 | -1.05 |
| DDX21        | 1.85  | 2.54  | 1.07  | 2.36  |
| DDX46        | -1.70 | -2.23 | -2.01 | -1.11 |
| DDX58        | 2.11  | 2.13  | -1.22 | 2.59  |
| DDX60        | 2.05  | 2.55  | -1.44 | 3.66  |
| DECR1        | -1.52 | -1.29 | -2.81 | 2.18  |
| DEF6         | -1.85 | -2.20 | -1.77 | -1.24 |
| DEK          | -1.07 | -1.21 | -2.26 | 1.87  |
| DENND2D      | 2.70  | 2.35  | 2.00  | 1.18  |
| DENND4A      | 1.67  | 3.28  | -1.47 | 4.82  |
| DGCR2        | -1.73 | -2.24 | -1.59 | -1.41 |
| DGKA         | -1.64 | -2.37 | -1.26 | -1.89 |
| DGKD         | -1.61 | -2.35 | -1.27 | -1.85 |
| DHCR7        | 1.46  | 1.01  | 3.14  | -3.12 |
| DHDDS        | -2.31 | -2.02 | -2.00 | -1.01 |
| DHRS7        | -1.79 | -2.05 | -2.22 | 1.09  |

|          |       |       |       |       |
|----------|-------|-------|-------|-------|
| DHTKD1   | -1.77 | -2.07 | -1.83 | -1.13 |
| DHX29    | -1.76 | -2.02 | -1.84 | -1.10 |
| DHX34    | -1.85 | -2.11 | -1.75 | -1.21 |
| DHX9     | -1.32 | -1.69 | -2.02 | 1.19  |
| DIAPH2   | 2.11  | 1.46  | 1.46  | -1.00 |
| DICER1   | -2.29 | -2.19 | -3.26 | 1.49  |
| DLEU2    | -1.07 | -1.28 | -2.12 | 1.65  |
| DMXL2    | 2.77  | 3.24  | 1.45  | 2.23  |
| DNAJA1   | 2.41  | 2.49  | 1.42  | 1.75  |
| DNAJB6   | -1.34 | -1.01 | -2.26 | 2.23  |
| DNAJB9   | 1.32  | 2.19  | -1.10 | 2.40  |
| DNAJC13  | -1.51 | -2.17 | -1.75 | -1.24 |
| DNAJC3   | -1.95 | -1.42 | -3.57 | 2.51  |
| DNAJC9   | -1.65 | -2.05 | -1.50 | -1.36 |
| DOCK11   | -1.27 | -2.14 | -1.94 | -1.10 |
| DOCK4    | 1.40  | 1.93  | -1.88 | 3.63  |
| DOCK5    | -1.76 | -1.74 | -3.09 | 1.78  |
| DOCK8    | -1.69 | -2.01 | -2.06 | 1.03  |
| DOT1L    | 1.77  | 2.11  | 1.47  | 1.44  |
| DPEP2    | -3.39 | -3.33 | -4.08 | 1.23  |
| DPEP3    | -3.62 | -3.51 | -3.89 | 1.11  |
| DPH2     | -1.82 | -1.68 | -2.10 | 1.25  |
| DPY19L3  | -1.25 | -2.21 | -1.02 | -2.16 |
| DPY30    | -3.61 | -4.67 | -3.60 | -1.30 |
| DSC2     | -1.68 | -1.26 | -4.75 | 3.77  |
| DSCR3    | -2.59 | -3.18 | -2.07 | -1.54 |
| DSN1     | -2.91 | -2.83 | -2.69 | -1.05 |
| DTX3L    | 1.62  | 1.73  | -1.26 | 2.18  |
| DULLARD  | -2.10 | -1.77 | -1.58 | -1.12 |
| DUS2L    | -3.11 | -3.69 | -2.32 | -1.59 |
| DUSP18   | -1.92 | -2.32 | -1.75 | -1.33 |
| DUSP3    | 2.39  | 2.44  | 1.41  | 1.73  |
| DUSP5    | 1.92  | 3.81  | 1.22  | 3.13  |
| DUSP6    | -3.14 | -1.43 | -3.65 | 2.55  |
| DUSP7    | -3.15 | -2.88 | -3.36 | 1.17  |
| DYNC1I2  | 1.50  | 1.09  | 2.48  | -2.27 |
| DYNC1LI1 | -3.05 | -2.59 | -4.11 | 1.58  |
| DYNLL1   | -2.21 | -2.44 | -2.20 | -1.11 |
| DYNLT3   | 3.66  | 4.33  | 2.40  | 1.81  |
| EBI3     | 1.32  | 2.08  | 1.18  | 1.77  |
| ECT2     | 2.54  | 1.52  | 1.21  | 1.26  |
| EDEM1    | -1.93 | -1.65 | -2.53 | 1.54  |
| EEDP1    | -1.70 | -1.90 | -2.61 | 1.38  |
| EFCAB2   | -1.62 | -1.87 | -2.35 | 1.25  |
| EFTUD2   | -2.70 | -2.63 | -2.16 | -1.22 |
| EGR1     | 1.80  | 1.73  | 2.04  | -1.18 |
| EGR3     | 1.51  | 2.82  | 1.23  | 2.30  |
| EHD1     | 2.69  | 2.71  | 2.11  | 1.28  |
| EIF1AY   | -3.44 | -3.04 | -4.98 | 1.64  |
| EIF1B    | 1.69  | 2.11  | 1.03  | 2.05  |

|           |       |       |       |       |
|-----------|-------|-------|-------|-------|
| EIF2AK1   | -1.59 | -2.06 | -1.53 | -1.35 |
| EIF2AK2   | 2.77  | 2.19  | 1.23  | 1.78  |
| EIF2C1    | -1.93 | -2.06 | -2.32 | 1.13  |
| EIF3D     | -1.79 | -1.33 | -2.01 | 1.51  |
| EIF3J     | -1.65 | -1.68 | -2.02 | 1.20  |
| EIF3L     | -2.54 | -2.93 | -2.02 | -1.45 |
| EIF3M     | -3.83 | -4.84 | -4.02 | -1.20 |
| EIF4A1    | -1.94 | -2.09 | -2.13 | 1.02  |
| EIF4ENIF1 | -2.03 | -2.10 | -1.85 | -1.13 |
| EIF4H     | -1.23 | -1.29 | -2.17 | 1.69  |
| EIF5      | -1.47 | -1.38 | -2.07 | 1.50  |
| ELF2      | 1.34  | 1.23  | -1.67 | 2.06  |
| ELL2      | 1.24  | 1.50  | -1.39 | 2.09  |
| ELMO2     | 2.36  | 1.38  | 1.68  | -1.22 |
| ELMOD2    | -1.71 | -2.10 | -1.96 | -1.07 |
| ELOF1     | -2.07 | -2.26 | -1.83 | -1.23 |
| EMR1      | 11.00 | 9.41  | 10.19 | -1.08 |
| EMR2      | -1.93 | -1.28 | -3.16 | 2.48  |
| ENPP2     | 2.36  | 1.40  | 1.53  | -1.09 |
| ENTPD7    | 2.86  | 1.59  | 5.07  | -3.18 |
| EPAS1     | 2.09  | 1.52  | 1.79  | -1.18 |
| EPB41     | -1.55 | -1.82 | -2.63 | 1.45  |
| EPHB1     | -2.60 | -1.87 | -3.35 | 1.80  |
| EPM2AIP1  | 1.99  | 2.23  | 1.02  | 2.19  |
| EPS15L1   | -3.07 | -3.78 | -3.70 | -1.02 |
| EPSTI1    | 1.90  | 2.13  | -1.41 | 3.01  |
| ERAL1     | 2.03  | 2.24  | 1.73  | 1.29  |
| ERAP1     | -1.80 | -1.43 | -2.34 | 1.63  |
| ERBB2IP   | -1.08 | 1.12  | -2.51 | 2.80  |
| ERCC5     | -1.67 | -2.02 | -1.56 | -1.29 |
| ERCC6     | -2.11 | -2.19 | -2.13 | -1.03 |
| ERGIC1    | -1.32 | -1.27 | -2.26 | 1.77  |
| ERH       | -2.16 | -2.21 | -2.27 | 1.03  |
| ERI1      | 3.46  | 2.15  | 1.49  | 1.44  |
| ERLIN1    | 2.29  | 1.59  | 1.96  | -1.23 |
| ERN1      | -1.87 | -1.84 | -2.48 | 1.35  |
| ERO1L     | -1.87 | -2.82 | -1.53 | -1.84 |
| ERP27     | -3.41 | -4.01 | -3.05 | -1.31 |
| ERV3      | -1.48 | -1.55 | -9.26 | 5.97  |
| ESCO1     | -1.85 | -1.67 | -2.91 | 1.74  |
| ESYT2     | -1.85 | -1.72 | -2.22 | 1.29  |
| ETS2      | 2.74  | 2.69  | 2.04  | 1.32  |
| ETV7      | 1.39  | 2.19  | -1.28 | 2.81  |
| EVI2A     | -2.91 | -2.38 | -5.50 | 2.31  |
| EVI5      | -1.35 | -2.25 | -2.03 | -1.11 |
| EXOSC1    | -2.14 | -2.35 | -1.92 | -1.23 |
| EXOSC4    | 1.95  | 1.74  | 2.42  | -1.39 |
| EXOSC9    | -1.15 | 1.26  | -1.59 | 2.01  |
| EXTL3     | -1.49 | -1.67 | -2.13 | 1.27  |
| EYA3      | 1.54  | 2.17  | -1.27 | 2.76  |

|          |       |       |       |       |
|----------|-------|-------|-------|-------|
| EZH2     | 2.03  | 2.43  | 1.17  | 2.07  |
| F11R     | -1.91 | -1.21 | -2.97 | 2.45  |
| F2RL1    | -2.38 | -2.17 | -3.42 | 1.58  |
| F5       | 2.44  | 1.33  | 1.77  | -1.33 |
| F8A1     | -1.83 | -2.06 | -1.41 | -1.46 |
| FADD     | -1.81 | -2.14 | -1.40 | -1.53 |
| FAIM3    | -2.55 | -2.40 | -2.88 | 1.20  |
| FAM111A  | -1.59 | -1.60 | -2.68 | 1.68  |
| FAM116A  | -1.99 | -2.29 | -2.69 | 1.17  |
| FAM117B  | -3.37 | -3.70 | -3.97 | 1.07  |
| FAM127A  | 1.32  | -1.88 | 1.09  | -2.05 |
| FAM134A  | -2.16 | -2.24 | -1.89 | -1.19 |
| FAM174A  | -3.05 | -2.62 | -6.18 | 2.36  |
| FAM177A1 | 3.09  | 1.80  | 1.42  | 1.27  |
| FAM188A  | 2.15  | 1.65  | 1.02  | 1.61  |
| FAM190B  | -2.07 | -2.09 | -1.88 | -1.11 |
| FAM36A   | -3.37 | -3.89 | -4.60 | 1.18  |
| FAM49A   | -1.54 | -1.17 | -3.37 | 2.88  |
| FAM53B   | -2.05 | -1.70 | -2.36 | 1.39  |
| FAM54B   | -1.98 | -2.13 | -1.89 | -1.13 |
| FAM63A   | -2.12 | -2.83 | -1.87 | -1.52 |
| FAM63B   | -2.06 | -2.23 | -1.63 | -1.37 |
| FAM78A   | -2.07 | -1.90 | -1.98 | 1.04  |
| FAM83E   | -2.76 | -3.09 | -2.00 | -1.54 |
| FAM91A1  | -1.57 | -1.50 | -3.04 | 2.03  |
| FAM96A   | -1.97 | -2.12 | -2.20 | 1.04  |
| FANCE    | -2.76 | -3.46 | -3.11 | -1.11 |
| FAR1     | -1.18 | -2.75 | -1.27 | -2.18 |
| FAR2     | -2.77 | -3.16 | -1.88 | -1.68 |
| FAS      | 1.78  | 1.74  | -1.47 | 2.55  |
| FBN2     | 1.16  | 1.44  | -1.71 | 2.46  |
| FBXL13   | -1.08 | -1.13 | -3.20 | 2.83  |
| FBXL20   | -2.64 | -3.81 | -2.99 | -1.27 |
| FBXL4    | -1.93 | -2.23 | -1.91 | -1.17 |
| FBXO9    | 2.10  | 1.06  | 1.69  | -1.59 |
| FCAR     | 2.32  | 1.65  | 2.24  | -1.36 |
| FCGR1A   | 1.57  | 1.72  | -1.38 | 2.37  |
| FCGR2B   | -2.69 | -1.76 | -4.18 | 2.38  |
| FCHO1    | -2.26 | -2.52 | -2.33 | -1.08 |
| FCHO2    | -1.05 | -1.89 | -3.54 | 1.88  |
| FCRL1    | 2.53  | 1.29  | 3.75  | -2.91 |
| FDFT1    | -1.48 | -2.13 | -1.44 | -1.48 |
| FFAR2    | 1.97  | 2.04  | 1.47  | 1.39  |
| FFAR3    | 2.30  | 2.31  | 1.24  | 1.86  |
| FGD4     | 2.41  | 1.88  | 1.61  | 1.16  |
| FGFR1OP  | -2.13 | -1.96 | -2.37 | 1.21  |
| FGL2     | -2.83 | -2.44 | -4.72 | 1.94  |
| FHL3     | -3.15 | -2.64 | -3.20 | 1.22  |
| FIG4     | -1.82 | -2.17 | -1.95 | -1.11 |
| FKBP11   | 2.23  | 1.92  | 1.59  | 1.21  |

|          |       |       |       |       |
|----------|-------|-------|-------|-------|
| FKBP5    | 2.45  | 1.89  | 1.66  | 1.14  |
| FLII     | -1.54 | -2.19 | -1.47 | -1.50 |
| FLJ10213 | 2.32  | 1.58  | 1.26  | 1.26  |
| FLJ36031 | 1.76  | 2.06  | 1.13  | 1.83  |
| FLJ43826 | -1.94 | -2.02 | -2.12 | 1.05  |
| FLOT1    | 2.16  | 2.27  | 1.45  | 1.56  |
| FLT3LG   | -1.58 | -1.54 | -2.08 | 1.35  |
| FLVCR1   | 1.01  | 1.10  | -2.06 | 2.26  |
| FMNL3    | 2.58  | 6.53  | 1.44  | 4.55  |
| FNBP1    | -1.23 | 1.57  | -1.50 | 2.36  |
| FNBP4    | -2.78 | -2.44 | -2.70 | 1.11  |
| FNDC3A   | 3.57  | 2.69  | 1.80  | 1.49  |
| FNDC3B   | 2.00  | 2.25  | 1.09  | 2.08  |
| FNTA     | -1.08 | -1.68 | -2.14 | 1.28  |
| FNTB     | -2.13 | -1.93 | -1.90 | -1.01 |
| FOXN2    | -1.91 | -3.10 | -1.59 | -1.95 |
| FOXN3    | -1.99 | -2.38 | -2.25 | -1.06 |
| FRAT1    | -2.32 | -2.57 | -2.60 | 1.01  |
| FRAT2    | -2.07 | -2.29 | -2.10 | -1.09 |
| FRG1     | -2.01 | -1.89 | -2.18 | 1.16  |
| FRY      | -2.18 | -3.17 | -2.88 | -1.10 |
| FRYL     | -1.45 | -2.17 | -2.22 | 1.02  |
| FSCN1    | 1.15  | 3.33  | -1.07 | 3.57  |
| FTSJD2   | 1.34  | 1.68  | -1.36 | 2.29  |
| FYB      | -1.31 | -1.30 | -2.26 | 1.74  |
| FYN      | -1.99 | -2.24 | -2.33 | 1.04  |
| G0S2     | 2.62  | 2.64  | 1.76  | 1.50  |
| G3BP1    | -2.02 | -1.83 | -1.98 | 1.08  |
| GAB1     | -2.25 | -2.92 | -3.85 | 1.32  |
| GABBR1   | 2.43  | 1.38  | 3.13  | -2.27 |
| GABPB1   | 1.68  | 2.06  | -1.16 | 2.39  |
| GADD45B  | 1.89  | 2.21  | 1.33  | 1.66  |
| GALC     | 2.31  | 2.77  | 1.36  | 2.04  |
| GALM     | -2.38 | -2.63 | -2.59 | -1.02 |
| GALNT3   | -2.79 | -3.19 | -2.24 | -1.43 |
| GARNL1   | 3.52  | 3.11  | 1.31  | 2.38  |
| GARNL4   | -1.87 | -2.30 | -1.92 | -1.20 |
| GAS7     | 2.52  | 2.00  | 2.48  | -1.24 |
| GATC     | -3.08 | -3.33 | -1.91 | -1.75 |
| GBP1     | 2.84  | 3.57  | -1.18 | 4.21  |
| GBP3     | 3.10  | 4.34  | 1.09  | 3.97  |
| GBP4     | 1.71  | 3.84  | -3.10 | 11.93 |
| GBP5     | 1.28  | 1.88  | -3.37 | 6.33  |
| GBP7     | 1.20  | 1.49  | -2.75 | 4.09  |
| GCC2     | 1.00  | -1.22 | -2.03 | 1.67  |
| GCH1     | 18.80 | 17.51 | 9.96  | 1.76  |
| GCM1     | -3.12 | -2.52 | -3.08 | 1.22  |
| GDE1     | -2.25 | -3.14 | -2.59 | -1.21 |
| GDI2     | -1.21 | -1.77 | -2.08 | 1.18  |
| GIMAP2   | -1.72 | 1.05  | -3.94 | 4.14  |

|         |       |       |       |       |
|---------|-------|-------|-------|-------|
| GIMAP4  | -1.57 | -1.06 | -3.98 | 3.77  |
| GIMAP7  | -1.92 | -2.10 | -2.13 | 1.02  |
| GJB6    | 1.69  | 1.24  | 2.28  | -1.84 |
| GK      | 2.31  | 2.34  | 1.27  | 1.85  |
| GK3P    | 2.60  | 1.73  | 1.72  | 1.01  |
| GK5     | 2.01  | 1.14  | 1.92  | -1.69 |
| GLA     | -1.15 | 1.32  | -1.82 | 2.40  |
| GLB1    | -2.24 | -2.80 | -2.81 | 1.00  |
| GLRX    | 1.62  | 2.11  | -1.33 | 2.80  |
| GLT8D1  | -3.74 | -3.55 | -3.57 | 1.01  |
| GLUD1   | -1.63 | -2.61 | -1.98 | -1.32 |
| GLUL    | -1.38 | -1.23 | -2.21 | 1.80  |
| GMCL1   | -1.85 | -2.17 | -1.84 | -1.18 |
| GMFB    | -2.23 | -2.32 | -1.79 | -1.30 |
| GNA15   | 2.99  | 2.71  | 1.93  | 1.40  |
| GNB2L1  | -1.51 | -2.36 | -1.23 | -1.91 |
| GNLY    | -1.97 | -2.11 | -2.18 | 1.03  |
| GOLPH3L | -1.84 | -1.48 | -2.37 | 1.61  |
| GORASP2 | -1.18 | 1.35  | -1.94 | 2.62  |
| GPBP1   | 1.27  | 1.41  | -1.65 | 2.32  |
| GPI     | 1.00  | -1.21 | 2.06  | -2.49 |
| GPR107  | -1.03 | 1.38  | -1.61 | 2.22  |
| GPR132  | 2.55  | 2.08  | 2.39  | -1.15 |
| GPR141  | 6.98  | 4.81  | 4.35  | 1.11  |
| GPR155  | 1.09  | -1.44 | -2.01 | 1.39  |
| GPR162  | -2.69 | -2.02 | -2.60 | 1.29  |
| GPR174  | -2.19 | -2.99 | -2.78 | -1.07 |
| GPR177  | -2.87 | -2.49 | -4.64 | 1.87  |
| GPR19   | -2.15 | -2.12 | -2.02 | -1.05 |
| GPR65   | 2.41  | 2.34  | 1.74  | 1.35  |
| GPR77   | -3.34 | -4.17 | -2.95 | -1.41 |
| GPR84   | 23.99 | 23.47 | 21.64 | 1.08  |
| GRAMD1A | 2.71  | 2.80  | 2.18  | 1.28  |
| GRAMD1C | -7.31 | -5.44 | -7.60 | 1.40  |
| GRINA   | 3.06  | 3.13  | 2.61  | 1.20  |
| GSK3B   | -1.49 | -1.93 | -2.24 | 1.16  |
| GSR     | -2.84 | -3.04 | -2.68 | -1.13 |
| GTF2A1  | -1.83 | -1.66 | -2.33 | 1.40  |
| GTF2B   | 1.13  | 1.39  | -1.46 | 2.04  |
| GTPBP1  | 2.27  | 1.92  | 2.06  | -1.07 |
| GTPBP10 | -2.26 | -2.28 | -2.10 | -1.08 |
| GYG1    | 6.70  | 3.50  | 5.72  | -1.64 |
| GYS1    | 1.30  | -1.04 | 2.03  | -2.11 |
| GZMK    | -2.43 | -2.81 | -2.88 | 1.02  |
| H2AFZ   | -1.76 | -2.37 | -2.06 | -1.15 |
| HADH    | -1.83 | -1.90 | -2.16 | 1.14  |
| HAGH    | -1.98 | -2.01 | -1.60 | -1.25 |
| HAL     | -1.65 | -2.09 | -2.87 | 1.37  |
| HBP1    | 1.04  | 1.09  | -1.99 | 2.17  |
| HCG27   | -1.75 | -1.62 | -2.31 | 1.43  |

|           |       |       |       |       |
|-----------|-------|-------|-------|-------|
| HCP5      | 1.06  | 1.14  | -1.80 | 2.05  |
| HDAC1     | -2.48 | -3.24 | -2.31 | -1.40 |
| HDAC2     | 1.59  | 1.96  | -1.18 | 2.31  |
| HDAC3     | -2.50 | -2.86 | -2.23 | -1.29 |
| HDAC5     | -1.78 | -1.69 | -2.10 | 1.24  |
| HDGF      | 1.98  | 3.30  | -1.07 | 3.53  |
| HEATR5A   | -1.69 | -3.65 | -3.60 | -1.02 |
| HEBP1     | -2.78 | -2.74 | -3.39 | 1.24  |
| HELB      | 9.85  | 7.64  | 4.35  | 1.76  |
| HERC1     | -1.81 | -2.70 | -1.87 | -1.45 |
| HERC3     | -1.38 | -1.71 | -2.12 | 1.24  |
| HERC5     | 1.83  | 2.53  | -2.12 | 5.36  |
| HERC6     | 1.59  | 1.96  | -1.44 | 2.81  |
| HERPUD1   | -2.42 | -2.15 | -2.41 | 1.12  |
| HEXB      | -2.01 | -1.77 | -3.92 | 2.21  |
| HEXIM1    | -2.53 | -2.06 | -2.74 | 1.33  |
| HGF       | 4.87  | 1.69  | 14.00 | -8.26 |
| HGSNAT    | -1.22 | -2.02 | -1.11 | -1.81 |
| HIATL1    | -1.27 | -2.02 | 1.01  | -2.04 |
| HIGD2A    | -1.35 | -1.86 | -2.23 | 1.20  |
| HINT3     | -1.16 | -1.15 | -2.33 | 2.03  |
| HIRA      | -2.19 | -2.51 | -1.90 | -1.32 |
| HISPPD1   | -1.43 | -2.22 | -1.67 | -1.32 |
| HIST1H1C  | -2.07 | -2.49 | -2.77 | 1.11  |
| HIST1H1E  | -1.89 | -2.47 | -1.71 | -1.44 |
| HIST1H2BC | -1.79 | -2.23 | -3.71 | 1.67  |
| HIST1H2BD | -1.40 | -2.19 | -2.14 | -1.02 |
| HIST1H2BF | -1.89 | -2.06 | -2.24 | 1.09  |
| HIST1H2BG | -1.97 | -1.83 | -2.17 | 1.19  |
| HIST1H3A  | -1.55 | -1.73 | -3.10 | 1.79  |
| HIST1H3C  | -1.53 | -1.68 | -2.20 | 1.31  |
| HIST1H4C  | -1.75 | -2.37 | -2.36 | -1.00 |
| HIST1H4E  | -1.51 | -1.74 | -2.01 | 1.15  |
| HIST1H4L  | -1.69 | -1.77 | -2.04 | 1.15  |
| HIST2H2BF | -1.93 | -2.35 | -5.16 | 2.20  |
| HIST4H4   | -2.03 | -2.61 | -2.13 | -1.23 |
| HIVEP1    | 3.35  | 3.38  | 1.62  | 2.09  |
| HIVEP2    | 4.59  | 4.96  | 2.01  | 2.47  |
| HK3       | 2.26  | 1.28  | 3.13  | -2.45 |
| HLA-DMA   | -1.81 | -1.41 | -2.04 | 1.45  |
| HLA-DPA1  | -4.48 | -5.36 | -5.57 | 1.04  |
| HLA-DPB1  | -3.57 | -4.11 | -4.25 | 1.03  |
| HLA-DRA   | -2.39 | 1.33  | -3.77 | 5.03  |
| HLA-F     | -1.01 | 1.16  | -2.02 | 2.34  |
| HLX       | 2.04  | 2.16  | 1.57  | 1.38  |
| HMGB2     | 1.31  | -1.60 | 1.48  | -2.36 |
| HMGCR     | -1.63 | -1.64 | -2.20 | 1.34  |
| HMGN4     | -2.45 | -2.07 | -2.64 | 1.27  |
| HMOX2     | -3.11 | -3.14 | -2.18 | -1.44 |
| HNRNPA1   | -1.21 | -1.80 | -2.10 | 1.16  |

|           |       |       |        |       |
|-----------|-------|-------|--------|-------|
| HNRNPK    | -1.24 | -1.39 | -2.14  | 1.54  |
| HNRNPM    | 1.11  | 1.11  | -1.87  | 2.07  |
| HNRNPR    | -1.76 | -1.53 | -2.63  | 1.72  |
| HORMAD1   | -1.20 | -1.19 | -2.39  | 2.00  |
| HP        | 4.83  | 2.54  | 8.66   | -3.40 |
| HPGD      | 2.13  | 1.30  | 2.17   | -1.67 |
| HPR       | 1.87  | 1.40  | 3.17   | -2.27 |
| HPS3      | -2.20 | -2.82 | -2.32  | -1.21 |
| HPSE      | -3.47 | -3.31 | -4.20  | 1.27  |
| HRH4      | 3.49  | 3.11  | 3.67   | -1.18 |
| HS3ST3B1  | 3.41  | 2.19  | 2.64   | -1.20 |
| HSD17B11  | -1.36 | -1.44 | -2.17  | 1.50  |
| HSD17B7P2 | -2.12 | -1.90 | -1.72  | -1.10 |
| HSDL2     | -1.33 | -2.11 | -1.79  | -1.18 |
| HSH2D     | -1.71 | -1.35 | -3.00  | 2.23  |
| HSP90AA1  | 2.37  | 2.25  | 1.27   | 1.76  |
| HSP90B1   | -2.09 | 1.16  | -3.45  | 4.02  |
| HSPA13    | -1.00 | 2.22  | -1.45  | 3.21  |
| HSPA1B    | 2.12  | 2.11  | 1.29   | 1.64  |
| HSPA4     | -1.63 | -1.32 | -2.19  | 1.65  |
| HSPBAP1   | -2.20 | -2.00 | -2.68  | 1.34  |
| HSPC159   | -2.14 | 1.07  | -4.47  | 4.80  |
| HVCN1     | -2.40 | -2.62 | -2.42  | -1.08 |
| ICAM1     | 2.47  | 2.79  | 1.25   | 2.23  |
| ID2       | -1.33 | -1.72 | -2.05  | 1.20  |
| IDH1      | -2.47 | -2.44 | -2.36  | -1.04 |
| IDI1      | 2.73  | 1.86  | 2.04   | -1.09 |
| IDO1      | 1.42  | 6.61  | 1.00   | 6.60  |
| IDS       | -1.80 | -1.95 | -2.06  | 1.05  |
| IER3      | 2.14  | 2.49  | 1.74   | 1.43  |
| IFI44     | 3.05  | 2.26  | -1.11  | 2.51  |
| IFI44L    | 2.57  | 2.04  | -1.03  | 2.10  |
| IFI6      | 1.07  | 1.36  | -1.90  | 2.59  |
| IFIH1     | 3.83  | 4.91  | 1.01   | 4.86  |
| IFIT1     | 1.03  | 1.62  | -3.11  | 5.05  |
| IFIT2     | 1.05  | 1.50  | -3.08  | 4.62  |
| IFIT3     | 1.26  | 1.53  | -1.81  | 2.77  |
| IFIT5     | 1.59  | 1.85  | -1.84  | 3.39  |
| IFNAR2    | -1.32 | -1.59 | -2.15  | 1.35  |
| IFRD1     | -1.59 | -1.82 | -2.42  | 1.33  |
| IGJ       | -2.14 | -2.91 | -3.13  | 1.07  |
| IGK@      | -1.58 | -2.47 | -2.84  | 1.15  |
| IK        | -1.41 | -1.45 | -2.03  | 1.40  |
| IKBKB     | 1.31  | 1.55  | -1.29  | 2.01  |
| IKBKE     | 1.99  | 3.24  | 1.31   | 2.47  |
| IKIP      | -8.45 | -8.37 | -11.56 | 1.38  |
| IL10RA    | 1.96  | 2.11  | 1.65   | 1.28  |
| IL13RA1   | 1.16  | 1.14  | -1.90  | 2.16  |
| IL18R1    | 5.79  | 2.75  | 2.90   | -1.05 |
| IL1A      | 2.10  | 9.03  | 1.53   | 5.91  |



|           |       |       |       |       |
|-----------|-------|-------|-------|-------|
| IL1B      | 2.48  | 3.44  | 1.09  | 3.16  |
| IL1RN     | 2.84  | 3.11  | 1.73  | 1.80  |
| IL4R      | 2.19  | 1.67  | 2.13  | -1.28 |
| IL6R      | -2.05 | -2.17 | -2.16 | -1.01 |
| IL6ST     | 7.49  | 6.18  | 3.34  | 1.85  |
| IL7R      | -4.11 | -6.28 | -6.67 | 1.06  |
| IL8       | 1.64  | 1.81  | -1.32 | 2.39  |
| ILF2      | 2.71  | 1.52  | 1.67  | -1.09 |
| IMPA2     | -2.17 | -3.08 | -2.16 | -1.42 |
| INPP5B    | -2.07 | -1.93 | -2.55 | 1.32  |
| INPP5D    | -1.74 | -2.32 | -2.14 | -1.09 |
| INSIG1    | -2.38 | -1.69 | -3.14 | 1.86  |
| INTS8     | -1.71 | -1.71 | -2.53 | 1.48  |
| IP6K1     | -1.26 | -1.24 | -2.01 | 1.62  |
| IPCEF1    | -2.42 | -2.62 | -1.89 | -1.39 |
| IQGAP2    | -1.73 | -2.17 | -2.53 | 1.17  |
| IRAK2     | 3.93  | 6.14  | 2.19  | 2.81  |
| IRAK3     | 4.77  | 4.18  | 3.43  | 1.22  |
| ISCA1     | -1.54 | -2.08 | -1.29 | -1.61 |
| ISCA2     | -1.66 | -2.21 | -1.85 | -1.19 |
| ISG20     | -1.18 | 1.38  | -2.03 | 2.82  |
| ISG20L2   | -1.56 | -1.42 | -2.24 | 1.57  |
| ITGA4     | -3.20 | -2.95 | -3.25 | 1.10  |
| ITGA5     | -3.19 | -2.70 | -4.43 | 1.64  |
| ITGA6     | 1.94  | 1.01  | 2.58  | -2.56 |
| ITGAL     | -1.96 | -2.42 | -2.01 | -1.21 |
| ITPK1     | -2.90 | -2.78 | -3.09 | 1.11  |
| ITPKB     | -1.97 | -1.85 | -2.06 | 1.11  |
| IVNS1ABP  | 2.05  | 2.33  | 1.13  | 2.06  |
| JAK2      | 2.42  | 1.38  | 1.61  | -1.16 |
| JARID2    | -3.65 | -3.08 | -5.96 | 1.93  |
| JDP2      | -2.78 | -2.75 | -2.50 | -1.10 |
| JKAMP     | -2.69 | -3.48 | -2.32 | -1.50 |
| JMJD1C    | -1.72 | -1.87 | -3.20 | 1.71  |
| JOSD1     | 2.90  | 1.92  | 2.50  | -1.30 |
| JTB       | -1.83 | -1.74 | -2.17 | 1.25  |
| KBTBD6    | 1.06  | -1.02 | 2.03  | -2.07 |
| KBTBD7    | -1.68 | -2.50 | 1.11  | -2.77 |
| KCNAB2    | -1.34 | -2.15 | -1.40 | -1.54 |
| KCNE3     | -1.89 | -2.18 | -2.28 | 1.05  |
| KCNJ2     | 1.39  | 2.01  | -1.33 | 2.68  |
| KCTD12    | -2.01 | -1.89 | -1.96 | 1.04  |
| KCTD20    | -1.76 | -1.09 | -3.32 | 3.05  |
| KDEL2     | -2.24 | -1.41 | -2.19 | 1.55  |
| KDM3A     | -2.79 | -2.53 | -4.69 | 1.85  |
| KHDRBS1   | -1.03 | -1.05 | -2.02 | 1.91  |
| KIAA0232  | -2.28 | -2.33 | -2.66 | 1.14  |
| KIAA0319L | -2.24 | -2.49 | -2.74 | 1.10  |
| KIAA0391  | -1.85 | -2.31 | -1.90 | -1.22 |
| KIAA0753  | -2.83 | -2.89 | -2.63 | -1.10 |

|           |       |       |       |       |
|-----------|-------|-------|-------|-------|
| KIAA1191  | -2.52 | -2.84 | -2.44 | -1.16 |
| KIAA1257  | -2.09 | -2.06 | -3.15 | 1.53  |
| KIAA1324  | -1.83 | -1.63 | -4.69 | 2.88  |
| KIAA1632  | 3.28  | 3.41  | 1.97  | 1.73  |
| KIAA1737  | -1.78 | -1.64 | -2.11 | 1.29  |
| KIF13A    | -1.77 | -1.72 | -3.09 | 1.79  |
| KIF2A     | -2.19 | -2.82 | -2.63 | -1.07 |
| KL        | 2.91  | 1.74  | 3.05  | -1.75 |
| KLF10     | -1.29 | 1.63  | -1.37 | 2.23  |
| KLF13     | -1.95 | -2.35 | -1.38 | -1.70 |
| KLF3      | -4.00 | -4.58 | -4.42 | -1.04 |
| KLHDC2    | -3.37 | -3.62 | -3.96 | 1.09  |
| KLHDC3    | -1.75 | -2.11 | -1.66 | -1.27 |
| KLHDC8B   | -3.53 | -2.13 | -2.80 | 1.32  |
| KLHL21    | -2.14 | -2.07 | -2.30 | 1.11  |
| KLHL24    | -1.73 | -1.69 | -3.17 | 1.87  |
| KLHL5     | 2.11  | 2.09  | 1.05  | 1.99  |
| KLRB1     | -1.78 | -1.90 | -2.10 | 1.11  |
| KLRD1     | -1.90 | -1.91 | -2.13 | 1.12  |
| KLRK1     | -2.06 | -2.49 | -2.57 | 1.03  |
| KPNA3     | -2.32 | -2.68 | -2.22 | -1.20 |
| LACTB     | 3.36  | 3.06  | 1.88  | 1.63  |
| LAIR1     | 4.65  | 3.39  | 3.80  | -1.12 |
| LAMP3     | 2.35  | 3.94  | 1.09  | 3.63  |
| LASS2     | -3.26 | -3.66 | -2.98 | -1.23 |
| LBR       | -1.97 | -2.73 | -1.72 | -1.59 |
| LCN2      | 2.57  | 2.14  | 4.63  | -2.16 |
| LDB1      | -2.54 | -2.93 | -2.18 | -1.35 |
| LDHA      | 1.80  | 1.16  | 2.73  | -2.36 |
| LDHB      | -2.94 | -4.67 | -5.33 | 1.14  |
| LEF1      | -1.98 | -2.67 | -2.57 | -1.04 |
| LEPROTL1  | -2.62 | -2.54 | -3.30 | 1.30  |
| LETM2     | -6.36 | -5.07 | -5.88 | 1.16  |
| LGALS1    | 1.58  | 1.17  | 2.87  | -2.46 |
| LGALS8    | 2.73  | 2.01  | 1.54  | 1.31  |
| LILRA1    | -4.68 | -3.75 | -5.34 | 1.43  |
| LILRA2    | -2.12 | -2.37 | -2.31 | -1.03 |
| LILRA5    | 2.08  | 1.43  | 1.88  | -1.32 |
| LIMK2     | 2.01  | 1.99  | 1.62  | 1.23  |
| LIMS1     | 7.54  | 6.80  | 3.21  | 2.11  |
| LIN7A     | -1.52 | -2.43 | -1.71 | -1.42 |
| LIX1L     | -1.88 | -2.26 | -1.86 | -1.21 |
| LMBRD1    | -1.38 | -1.91 | -2.64 | 1.38  |
| LMNB1     | 3.03  | 3.06  | 1.39  | 2.19  |
| LOC152217 | -2.03 | -1.78 | -1.97 | 1.11  |
| LOC283588 | -2.25 | -2.16 | -2.12 | -1.02 |
| LOC284757 | 2.24  | 1.04  | 2.17  | -2.09 |
| LOC285696 | 2.42  | 1.72  | 1.73  | -1.00 |
| LOC554203 | -2.08 | -2.07 | -2.31 | 1.11  |
| LOXHD1    | 2.62  | 1.79  | 2.25  | -1.26 |

|           |       |       |       |       |
|-----------|-------|-------|-------|-------|
| LPCAT1    | 1.74  | 2.01  | 1.18  | 1.70  |
| LPCAT3    | 1.24  | -1.55 | 1.38  | -2.15 |
| LPIN2     | -1.86 | -1.60 | -2.58 | 1.61  |
| LPPR2     | -1.69 | -2.22 | -1.28 | -1.73 |
| LPXN      | -3.52 | -3.10 | -3.88 | 1.25  |
| LRMP      | -3.93 | -3.44 | -5.90 | 1.71  |
| LRRC25    | -3.24 | -2.60 | -2.89 | 1.11  |
| LRRC4     | -2.58 | -2.97 | -2.15 | -1.38 |
| LRRC6     | -1.27 | -1.44 | -2.51 | 1.74  |
| LRRC8B    | -1.29 | -1.22 | -2.17 | 1.78  |
| LRRC8C    | -2.00 | -2.08 | -2.14 | 1.03  |
| LRRC8D    | 1.10  | 1.72  | -1.56 | 2.69  |
| LRRFIP1   | -2.89 | -3.24 | -3.73 | 1.15  |
| LRRN1     | 1.03  | -1.83 | 1.50  | -2.74 |
| LSM10     | -1.93 | -1.53 | -2.13 | 1.39  |
| LSM14B    | -2.54 | -3.07 | -1.82 | -1.69 |
| LSS       | 1.44  | 2.15  | 1.20  | 1.79  |
| LTF       | 1.23  | 1.21  | 2.68  | -2.23 |
| LUC7L3    | -1.86 | -1.97 | -2.43 | 1.23  |
| LXN       | -3.19 | -3.22 | -3.24 | 1.01  |
| LY75      | -2.03 | -2.02 | -3.81 | 1.89  |
| LY96      | 1.26  | 1.05  | -1.94 | 2.03  |
| LYPLAL1   | -1.84 | -1.68 | -2.16 | 1.29  |
| LYRM5     | -1.34 | -1.95 | -3.35 | 1.72  |
| LYSMD3    | -1.17 | -1.19 | -2.21 | 1.87  |
| LZIC      | -2.04 | -2.25 | -2.00 | -1.13 |
| M6PR      | -2.41 | -1.54 | -2.39 | 1.55  |
| MAD2L2    | 2.08  | 1.82  | 1.71  | 1.06  |
| MAK       | 1.00  | -1.19 | -2.31 | 1.93  |
| MALT1     | -1.64 | -2.09 | -1.71 | -1.22 |
| MAML2     | -1.63 | 1.31  | -4.33 | 5.65  |
| MAN1A1    | -1.25 | 1.07  | -2.72 | 2.92  |
| MAN2A1    | -1.95 | -2.16 | -2.96 | 1.37  |
| MANBA     | -1.37 | -1.31 | -2.35 | 1.80  |
| MANBAL    | -1.64 | -1.38 | -2.14 | 1.56  |
| MANSC1    | -1.78 | -3.70 | -1.41 | -2.61 |
| MAP1LC3A  | 1.88  | 2.43  | 1.17  | 2.07  |
| MAP2K4    | -1.84 | -1.96 | -3.17 | 1.62  |
| MAP3K2    | -1.95 | -2.39 | -3.20 | 1.34  |
| MAP3K3    | -2.52 | -4.05 | -2.00 | -2.03 |
| MAP3K5    | -1.28 | -1.31 | -2.88 | 2.20  |
| MAP3K7IP2 | -1.02 | 1.15  | -1.92 | 2.21  |
| MAP3K8    | 1.27  | 1.74  | -1.44 | 2.51  |
| MAPK1     | -1.60 | -2.13 | -1.53 | -1.39 |
| MAPK14    | 2.12  | 1.55  | 1.50  | 1.04  |
| MAPK3     | -1.60 | -2.28 | -1.53 | -1.49 |
| MAPK9     | -1.16 | -1.18 | -2.25 | 1.91  |
| MAPKAPK3  | -2.19 | -2.03 | -2.25 | 1.11  |
| MAPKSP1   | -1.02 | 1.29  | -1.56 | 2.02  |
| MAPRE2    | -1.70 | -2.29 | -2.30 | 1.01  |

|          |       |       |       |       |
|----------|-------|-------|-------|-------|
| MAPRE3   | -2.81 | -2.77 | -3.30 | 1.19  |
| MARCKS   | 2.70  | 2.89  | 1.67  | 1.74  |
| MASTL    | 1.37  | 1.47  | -1.36 | 2.00  |
| MAT2A    | -1.83 | -2.06 | -1.82 | -1.13 |
| MAT2B    | 1.01  | 1.11  | -1.82 | 2.02  |
| MATR3    | -1.93 | -1.93 | -2.42 | 1.26  |
| MBD4     | -2.84 | -3.95 | -3.24 | -1.22 |
| MBIP     | -2.74 | -3.28 | -2.54 | -1.29 |
| MBP      | -2.85 | -2.33 | -2.64 | 1.13  |
| MBTD1    | -1.88 | -2.14 | -2.17 | 1.02  |
| MCTP1    | 4.32  | 4.81  | 2.26  | 2.13  |
| MDH2     | -1.97 | -2.30 | -1.67 | -1.37 |
| MDM2     | -1.27 | 1.05  | -3.10 | 3.25  |
| MDM4     | -1.27 | -1.59 | -2.18 | 1.37  |
| MDS2     | -2.22 | -2.45 | -2.66 | 1.09  |
| ME2      | -1.71 | -2.55 | -1.37 | -1.86 |
| MEA1     | -2.22 | -2.29 | -2.18 | -1.05 |
| MED25    | -2.43 | -2.51 | -2.56 | 1.02  |
| MEF2A    | 1.68  | -1.36 | 1.82  | -2.47 |
| MEF2C    | -4.06 | -3.83 | -4.17 | 1.09  |
| METAP1   | -2.24 | -2.53 | -2.30 | -1.10 |
| METTL4   | -1.76 | -1.67 | -2.17 | 1.30  |
| METTL9   | 1.96  | 1.35  | 2.01  | -1.48 |
| MFN1     | -1.48 | -1.80 | -2.25 | 1.25  |
| MFNG     | -3.03 | -3.12 | -3.00 | -1.04 |
| MFSD2    | 1.37  | 2.82  | 1.15  | 2.44  |
| MFSD5    | -2.52 | -2.19 | -1.95 | -1.12 |
| MFSD8    | -2.06 | -1.82 | -2.30 | 1.27  |
| MGAT4A   | -1.60 | -3.07 | -2.44 | -1.26 |
| MGAT5    | -1.75 | -1.48 | -2.29 | 1.54  |
| MGC16384 | -2.49 | -1.50 | -4.20 | 2.81  |
| MGC39372 | 1.31  | 2.39  | 1.13  | 2.12  |
| MICAL2   | -2.80 | -4.05 | -2.91 | -1.39 |
| MICALCL  | -1.99 | -2.05 | -2.04 | -1.01 |
| MID1IP1  | -3.72 | -3.33 | -4.16 | 1.25  |
| MITD1    | 1.34  | 1.34  | -1.59 | 2.13  |
| MKLN1    | -1.99 | -2.66 | -3.40 | 1.27  |
| MKRN2    | -1.98 | -2.09 | -1.77 | -1.18 |
| MLH1     | 2.96  | 3.18  | 1.63  | 1.95  |
| MLLT6    | 2.68  | 2.64  | 1.87  | 1.41  |
| MME      | -1.15 | -1.36 | -3.09 | 2.26  |
| MMP8     | 2.49  | 1.55  | 12.38 | -7.96 |
| MMP9     | 1.78  | 1.15  | 2.44  | -2.12 |
| MON2     | -2.03 | -2.45 | -1.52 | -1.62 |
| MOP-1    | -1.75 | -2.12 | -1.35 | -1.57 |
| MOSC1    | -1.43 | -2.25 | -1.30 | -1.73 |
| MOSPD2   | -1.45 | -1.68 | -2.35 | 1.40  |
| MOV10    | 1.04  | 1.58  | -1.54 | 2.42  |
| MPHOSPH8 | -1.60 | -1.80 | -2.12 | 1.17  |
| MPPE1    | -4.97 | -5.00 | -5.68 | 1.14  |

|            |       |       |       |       |
|------------|-------|-------|-------|-------|
| MPZL1      | -4.80 | -3.25 | -7.88 | 2.43  |
| MR1        | 2.22  | 2.18  | 1.23  | 1.78  |
| MRPL51     | -1.33 | -1.77 | 1.30  | -2.29 |
| MRPS14     | -2.53 | -2.34 | -2.04 | -1.15 |
| MS4A6A     | 1.22  | -1.62 | 1.33  | -2.16 |
| MSL2       | -1.54 | -1.49 | -2.00 | 1.34  |
| MTFMT      | -2.71 | -2.63 | -3.65 | 1.39  |
| MTIF3      | -1.68 | -2.17 | -1.45 | -1.50 |
| MTM1       | -2.37 | -3.27 | -2.56 | -1.28 |
| MTMR10     | -1.75 | -2.29 | -2.01 | -1.14 |
| MTMR12     | -2.95 | -3.44 | -2.92 | -1.18 |
| MTRR       | 2.34  | 1.08  | 2.49  | -2.30 |
| MX1        | 2.24  | 2.50  | 1.19  | 2.09  |
| MXI1       | -2.18 | -2.14 | -2.05 | -1.04 |
| MYLIP      | -1.63 | -1.51 | -2.62 | 1.73  |
| MYO5A      | -1.38 | -2.31 | -1.79 | -1.29 |
| MYST1      | -1.96 | -1.65 | -2.08 | 1.26  |
| MYST2      | -1.52 | -1.61 | -2.01 | 1.25  |
| MYT1L      | -2.27 | -2.24 | -2.04 | -1.10 |
| N4BP1      | 2.09  | 2.07  | 1.31  | 1.58  |
| NAAA       | -4.58 | -2.24 | -4.60 | 2.05  |
| NAB1       | 1.22  | 1.44  | -2.11 | 3.04  |
| NAPG       | -2.46 | -2.46 | -2.36 | -1.04 |
| NARS       | -1.98 | -2.03 | -1.43 | -1.42 |
| NAT13      | -3.06 | -2.70 | -2.95 | 1.09  |
| NBEAL1     | -2.11 | -2.37 | -2.46 | 1.04  |
| NBN        | 3.89  | 3.87  | 2.02  | 1.92  |
| NCAPD2     | -1.29 | -1.74 | 1.17  | -2.03 |
| NCK1       | -1.88 | -1.96 | -2.44 | 1.24  |
| NCKAP1L    | -1.56 | -2.69 | -1.13 | -2.37 |
| NCL        | -2.04 | -1.80 | -2.48 | 1.38  |
| NCOA1      | -1.35 | -1.71 | -2.16 | 1.27  |
| NCOA3      | -1.33 | -2.16 | -1.34 | -1.61 |
| NCOA4      | -1.31 | -1.09 | -2.17 | 1.98  |
| NCOA6      | -1.64 | -2.34 | -1.54 | -1.52 |
| NCOR1      | -1.41 | -2.23 | -1.44 | -1.56 |
| NCRNA00152 | 2.37  | 2.36  | 1.09  | 2.16  |
| NCRNA00173 | -2.52 | -2.64 | -3.71 | 1.41  |
| NCRNA00189 | 1.72  | 1.77  | -1.66 | 2.94  |
| NCRNA00204 | -1.39 | -1.54 | -4.78 | 3.10  |
| NDE1       | -1.76 | -1.50 | -2.69 | 1.79  |
| NDRG3      | -1.33 | -2.10 | -1.83 | -1.15 |
| NDST1      | -1.75 | -2.39 | -1.67 | -1.43 |
| NDST2      | 3.13  | 1.84  | 3.16  | -1.72 |
| NDUFB3     | 1.81  | 1.88  | -1.14 | 2.14  |
| NDUFB5     | -2.10 | -2.02 | -2.23 | 1.11  |
| NDUFB6     | -1.45 | -1.48 | -2.75 | 1.86  |
| NDUFS3     | -1.83 | -2.02 | -1.51 | -1.34 |
| NEDD4      | 2.32  | 1.21  | 2.41  | -2.00 |
| NEDD9      | -1.59 | 1.04  | -2.93 | 3.05  |

|        |       |       |       |       |
|--------|-------|-------|-------|-------|
| NEK6   | -2.82 | -3.94 | -2.38 | -1.66 |
| NEK7   | 1.04  | -1.30 | -2.26 | 1.74  |
| NFATC3 | -2.23 | -2.85 | -2.29 | -1.24 |
| NFE2L1 | -2.09 | -2.29 | -1.75 | -1.31 |
| NFE2L2 | 1.41  | 1.62  | -1.60 | 2.59  |
| NF-E4  | -1.50 | -1.39 | -3.36 | 2.42  |
| NFKB1  | 3.27  | 3.65  | 1.59  | 2.29  |
| NFKB2  | 3.13  | 3.39  | 2.32  | 1.46  |
| NFKBIE | 1.76  | 2.51  | 1.12  | 2.24  |
| NFKBIZ | 2.00  | 2.03  | 1.17  | 1.74  |
| NFXL1  | -3.15 | -2.31 | -3.83 | 1.66  |
| NGLY1  | -1.77 | -2.56 | -2.40 | -1.06 |
| NIACR1 | 2.67  | 3.02  | 1.39  | 2.17  |
| NIACR2 | 2.91  | 3.19  | 1.36  | 2.35  |
| NIN    | -1.35 | -2.45 | -1.31 | -1.87 |
| NINJ1  | -1.04 | 1.14  | -1.83 | 2.09  |
| NKTR   | -1.96 | -2.57 | -2.38 | -1.08 |
| NLRC4  | 2.59  | 2.00  | 1.68  | 1.19  |
| NLRP1  | -1.41 | -1.43 | -2.08 | 1.46  |
| NLRP3  | 3.55  | 4.06  | 1.25  | 3.25  |
| NLRP6  | -2.54 | -1.40 | -2.93 | 2.09  |
| NMI    | 1.02  | 1.12  | -2.58 | 2.90  |
| NONO   | -1.97 | -1.87 | -2.31 | 1.23  |
| NOV    | -2.76 | -2.53 | -3.45 | 1.36  |
| NPC2   | -1.82 | -1.36 | -2.94 | 2.16  |
| NPL    | -1.27 | -1.37 | -2.94 | 2.14  |
| NPM1   | -1.46 | -2.24 | -2.01 | -1.11 |
| NR3C1  | -1.65 | -1.94 | -2.09 | 1.08  |
| NSD1   | -2.36 | -2.71 | -2.23 | -1.22 |
| NSF    | -2.34 | -2.85 | -1.80 | -1.58 |
| NSUN6  | 2.35  | 2.04  | 1.37  | 1.48  |
| NSUN7  | 2.09  | 1.37  | 1.16  | 1.18  |
| NUB1   | 1.20  | 1.41  | -2.29 | 3.23  |
| NUBP1  | 1.02  | 1.66  | -1.34 | 2.22  |
| NUDT21 | -3.42 | -4.21 | -2.73 | -1.54 |
| NUDT3  | -1.59 | -1.69 | -2.01 | 1.19  |
| NUDT5  | -1.52 | -1.29 | -2.42 | 1.88  |
| NUP153 | -1.92 | -1.92 | -2.91 | 1.52  |
| NUP43  | -1.98 | -2.26 | -2.01 | -1.13 |
| OAS1   | 1.46  | 1.73  | -1.32 | 2.27  |
| OAS2   | 1.76  | 2.19  | -1.27 | 2.77  |
| OAS3   | 2.67  | 3.17  | 1.41  | 2.24  |
| OASL   | -1.08 | 1.28  | -1.94 | 2.48  |
| OAZ2   | -1.93 | -1.51 | -2.86 | 1.90  |
| OCR1   | -1.63 | -2.32 | -5.89 | 2.54  |
| ODZ1   | 2.97  | 1.30  | 3.71  | -2.86 |
| OGFRL1 | -1.89 | -1.79 | -2.92 | 1.63  |
| OLAH   | 3.39  | 2.17  | 1.84  | 1.18  |
| OLFM4  | 1.47  | 1.17  | 3.84  | -3.28 |
| OLR1   | 10.25 | 11.17 | 8.70  | 1.28  |

|          |        |       |        |       |
|----------|--------|-------|--------|-------|
| OR5AU1   | 2.10   | 1.32  | 1.04   | 1.27  |
| ORAI3    | -2.32  | -1.90 | -1.91  | 1.01  |
| ORC4L    | -1.42  | -1.83 | -2.35  | 1.28  |
| ORM1     | 7.02   | 6.73  | 4.06   | 1.66  |
| ORM2     | 6.66   | 7.15  | 3.35   | 2.14  |
| ORMDL1   | -2.03  | -2.48 | -2.15  | -1.15 |
| OSBPL11  | -1.43  | -1.49 | -2.63  | 1.77  |
| OSGIN2   | -1.66  | -1.56 | -3.48  | 2.23  |
| OSM      | 3.17   | 2.74  | 2.67   | 1.03  |
| OSTalpha | 2.11   | 1.50  | 2.14   | -1.43 |
| OSTM1    | -1.42  | -1.44 | -2.11  | 1.47  |
| OXA1L    | -2.19  | -2.21 | -1.74  | -1.27 |
| OXR1     | -1.84  | -2.30 | -2.51  | 1.09  |
| P2RX1    | -1.43  | -2.13 | -1.27  | -1.68 |
| P2RY10   | -11.76 | -7.18 | -11.63 | 1.62  |
| P2RY14   | 2.86   | 3.20  | 1.39   | 2.30  |
| P4HA1    | 1.78   | 1.98  | -1.07  | 2.12  |
| PACS1    | -1.58  | -2.13 | -1.94  | -1.10 |
| PADI4    | 1.63   | -1.11 | 1.92   | -2.12 |
| PAG1     | 2.34   | 1.81  | 2.32   | -1.28 |
| PAK1     | -1.47  | -1.37 | -2.04  | 1.49  |
| PAK2     | -1.90  | -1.85 | -2.41  | 1.30  |
| PAPD5    | -3.79  | -4.04 | -3.90  | -1.04 |
| PARN     | -1.77  | -2.07 | -2.31  | 1.12  |
| PARP12   | 1.42   | 1.64  | -1.23  | 2.01  |
| PARP14   | 1.75   | 2.22  | -1.67  | 3.71  |
| PARP16   | -1.78  | -2.21 | -1.90  | -1.17 |
| PARP8    | -1.40  | -1.39 | -2.88  | 2.07  |
| PARP9    | 1.30   | 1.65  | -1.54  | 2.54  |
| PBX2     | -1.36  | -1.76 | -2.84  | 1.61  |
| PBXIP1   | -2.17  | -2.10 | -2.33  | 1.11  |
| PCGF5    | -2.16  | -1.83 | -3.78  | 2.06  |
| PCM1     | -1.18  | -2.33 | -1.68  | -1.39 |
| PCMT1    | -1.51  | -2.29 | 1.04   | -2.39 |
| PCMTD1   | -1.05  | -1.33 | -2.02  | 1.51  |
| PCMTD2   | -2.24  | -2.69 | -2.88  | 1.07  |
| PCTK2    | -1.56  | -1.59 | -2.06  | 1.30  |
| PDCD1LG2 | 1.19   | 2.29  | -1.08  | 2.47  |
| PDCD4    | -1.13  | -1.01 | -3.41  | 3.38  |
| PDE3B    | -1.15  | -2.03 | -1.62  | -1.25 |
| PDE4B    | 1.23   | 1.48  | -2.03  | 3.01  |
| PDE7A    | -2.59  | -3.03 | -3.48  | 1.15  |
| PDIA6    | -1.86  | -1.15 | -2.62  | 2.27  |
| PDLIM2   | -2.42  | -2.23 | -2.32  | 1.04  |
| PDLIM5   | 1.40   | 1.75  | -1.15  | 2.01  |
| PDPK1    | -1.66  | -2.26 | -1.25  | -1.80 |
| PDS5B    | -1.19  | -2.07 | -1.86  | -1.11 |
| PDSS1    | 2.72   | 1.78  | 2.44   | -1.37 |
| PDZD8    | -1.91  | -3.45 | -1.25  | -2.77 |
| PECAM1   | -4.68  | -3.30 | -5.57  | 1.69  |

|          |       |       |        |       |
|----------|-------|-------|--------|-------|
| PECR     | 2.05  | 1.02  | 2.46   | -2.40 |
| PELI1    | 1.48  | 1.51  | -1.34  | 2.03  |
| PELI2    | -2.02 | -2.42 | -2.08  | -1.16 |
| PER3     | -2.52 | -2.15 | -1.69  | -1.27 |
| PFKFB2   | 3.33  | 1.50  | 4.30   | -2.87 |
| PFKFB3   | 3.96  | 3.04  | 3.83   | -1.26 |
| PGCP     | -1.28 | -1.26 | -2.15  | 1.71  |
| PGLYRP1  | 1.35  | -1.10 | 2.25   | -2.49 |
| PGM2     | -2.71 | -4.13 | -2.05  | -2.02 |
| PGRMC2   | -2.18 | -2.21 | -2.41  | 1.09  |
| PHF11    | 1.44  | 1.33  | -1.70  | 2.26  |
| PHF17    | -2.22 | -2.15 | -2.03  | -1.06 |
| PHF20    | -1.49 | -1.23 | -2.33  | 1.90  |
| PHF3     | -1.61 | -2.05 | -2.43  | 1.19  |
| PHKG2    | -1.76 | -2.15 | -1.54  | -1.40 |
| PHOSPHO1 | -8.71 | -7.85 | -10.27 | 1.31  |
| PI3      | -2.32 | 1.89  | -2.93  | 5.53  |
| PI4K2B   | 1.46  | 2.47  | 1.07   | 2.31  |
| PICALM   | -1.18 | -1.34 | -2.12  | 1.59  |
| PIGB     | -4.71 | -3.94 | -6.30  | 1.60  |
| PIGS     | -2.38 | -2.80 | -1.69  | -1.66 |
| PIGX     | -4.51 | -2.63 | -10.23 | 3.88  |
| PIH1D1   | -1.86 | -1.91 | -3.03  | 1.58  |
| PIK3AP1  | 2.69  | 3.02  | 2.01   | 1.50  |
| PIK3C2A  | -1.82 | -2.06 | -2.40  | 1.17  |
| PIK3CA   | -1.24 | -1.50 | -2.31  | 1.54  |
| PIK3CB   | -1.92 | -2.55 | -1.90  | -1.34 |
| PIK3R1   | -2.65 | -3.64 | -1.91  | -1.90 |
| PIKFYVE  | -1.76 | -2.19 | -2.16  | -1.01 |
| PIP4K2C  | -2.55 | -2.64 | -2.19  | -1.21 |
| PIP5K1B  | -1.74 | -2.01 | -1.70  | -1.18 |
| PISD     | -2.35 | -2.07 | -2.35  | 1.13  |
| PKM2     | 1.41  | -1.13 | 2.47   | -2.79 |
| PKN2     | -2.77 | -2.98 | -5.49  | 1.84  |
| PLAGL2   | 2.65  | 3.18  | 1.31   | 2.44  |
| PLAU     | 1.39  | 2.87  | 1.16   | 2.48  |
| PLCG2    | -1.80 | -2.18 | -1.94  | -1.12 |
| PLD1     | 1.91  | 2.38  | -1.08  | 2.56  |
| PLEKHA7  | -1.70 | -2.05 | -2.13  | 1.04  |
| PLEKHF2  | 1.75  | 2.06  | -1.65  | 3.40  |
| PLEKHO1  | -2.60 | -1.62 | -4.68  | 2.89  |
| PLIN5    | 2.81  | 2.92  | 1.94   | 1.50  |
| PLK3     | 2.81  | 3.42  | 1.67   | 2.05  |
| PLP2     | -1.05 | -1.66 | 1.29   | -2.14 |
| PLSCR1   | 4.27  | 3.73  | 2.69   | 1.38  |
| PMAIP1   | -4.37 | -1.64 | -6.00  | 3.65  |
| PML      | 1.97  | 2.15  | 1.27   | 1.69  |
| PMS2CL   | -1.61 | -1.45 | -2.70  | 1.86  |
| PNKD     | 1.57  | 2.07  | 1.05   | 1.97  |
| PNPLA8   | 1.33  | 1.26  | -1.71  | 2.15  |



|         |       |       |       |       |
|---------|-------|-------|-------|-------|
| PNPT1   | 1.72  | 2.44  | -1.14 | 2.77  |
| POLB    | -1.36 | -1.03 | -3.18 | 3.09  |
| POLR1D  | -1.98 | -2.22 | -1.71 | -1.30 |
| POLR2B  | -1.86 | -1.93 | -2.48 | 1.28  |
| POLR2C  | -1.64 | -2.07 | -1.68 | -1.23 |
| POLR2F  | -1.92 | -2.24 | -1.83 | -1.23 |
| POLR2G  | -2.38 | -2.54 | -2.12 | -1.20 |
| POLR3K  | -2.48 | -2.50 | -2.40 | -1.04 |
| POR     | 2.38  | 1.73  | 2.11  | -1.22 |
| POU2F1  | -1.72 | -1.67 | -2.06 | 1.23  |
| PPCDC   | -1.40 | -1.02 | -2.08 | 2.04  |
| PPCS    | -1.79 | -2.04 | -2.14 | 1.05  |
| PPFIA1  | -2.23 | -2.50 | -2.53 | 1.01  |
| PPFIBP2 | -1.65 | -2.62 | -1.14 | -2.30 |
| PPIB    | -2.27 | -1.86 | -1.55 | -1.20 |
| PPIF    | 1.25  | 2.01  | -2.36 | 4.73  |
| PPM1F   | -1.82 | -1.37 | -2.27 | 1.65  |
| PPM1M   | -1.64 | -2.27 | -1.42 | -1.60 |
| PPP1CA  | -2.01 | -3.07 | -1.49 | -2.06 |
| PPP1CC  | -5.75 | -3.76 | -8.28 | 2.20  |
| PPP1R7  | -2.04 | -2.40 | -2.00 | -1.20 |
| PPP2R1A | -1.62 | -2.21 | -1.24 | -1.78 |
| PPP2R2A | -1.21 | -1.17 | -2.34 | 1.99  |
| PPP3CA  | -1.30 | -1.66 | -2.11 | 1.27  |
| PPP4R2  | 2.27  | 1.82  | 1.45  | 1.25  |
| PPT1    | -1.63 | -1.44 | -2.95 | 2.05  |
| PPTC7   | -2.98 | -2.36 | -5.22 | 2.21  |
| PRAM1   | -1.94 | -2.37 | -1.62 | -1.46 |
| PRDM1   | 2.18  | 2.59  | -1.30 | 3.37  |
| PRDM8   | 2.48  | 3.02  | 1.38  | 2.19  |
| PRKAA1  | -1.82 | -2.12 | -2.03 | -1.04 |
| PRKACB  | -1.94 | -2.33 | -2.38 | 1.02  |
| PRKAG2  | -1.87 | -1.48 | -3.23 | 2.18  |
| PRMT5   | -1.28 | -1.83 | -2.02 | 1.11  |
| PRPF18  | -1.37 | -2.04 | -1.61 | -1.27 |
| PRPF40A | -1.56 | -1.53 | -2.05 | 1.34  |
| PRPF4B  | -1.84 | -1.62 | -2.29 | 1.42  |
| PRPF8   | -1.70 | -2.02 | -1.97 | -1.03 |
| PRPSAP1 | 1.99  | 2.34  | 1.28  | 1.82  |
| PRR5L   | 2.10  | 2.94  | 1.13  | 2.60  |
| PRRG4   | -1.98 | -1.35 | -5.31 | 3.94  |
| PRUNE   | -2.43 | -2.59 | -2.61 | 1.01  |
| PSD4    | -1.99 | -1.87 | -2.40 | 1.29  |
| PSIP1   | -2.94 | -3.17 | -3.07 | -1.03 |
| PSMA3   | 1.34  | 1.60  | -1.68 | 2.68  |
| PSMB1   | -1.28 | -1.05 | -2.28 | 2.18  |
| PSMB2   | -2.27 | -2.18 | -2.06 | -1.06 |
| PSMB8   | 1.17  | 1.31  | -1.73 | 2.27  |
| PSMB9   | -1.17 | 1.08  | -1.89 | 2.03  |
| PSMD5   | -1.50 | -2.21 | -1.34 | -1.64 |

|           |       |       |       |       |
|-----------|-------|-------|-------|-------|
| PSME3     | -1.97 | -2.06 | -1.91 | -1.08 |
| PSME4     | -1.42 | -1.68 | -2.39 | 1.42  |
| PSMF1     | -1.70 | -2.07 | -1.38 | -1.50 |
| PSTPIP1   | -2.02 | -2.33 | -1.71 | -1.36 |
| PSTPIP2   | 6.41  | 6.02  | 4.98  | 1.21  |
| PTBP1     | -2.04 | -1.92 | -1.99 | 1.04  |
| PTDSS1    | -2.17 | -2.24 | -1.67 | -1.34 |
| PTGER2    | 2.65  | 2.80  | 1.83  | 1.54  |
| PTGER4    | -3.83 | -1.63 | -5.33 | 3.27  |
| PTP4A2    | -1.85 | -2.14 | -2.07 | -1.03 |
| PTP4A3    | -3.33 | -1.47 | -3.99 | 2.72  |
| PTPN12    | 1.34  | 1.39  | -1.57 | 2.17  |
| PTPN2     | 3.00  | 2.14  | 1.60  | 1.33  |
| PTRH2     | -2.06 | -1.52 | -3.61 | 2.37  |
| PTX3      | 2.47  | 1.77  | 1.65  | 1.07  |
| PUM2      | -1.41 | -1.48 | -2.45 | 1.65  |
| PUS3      | 2.22  | 1.70  | 2.17  | -1.27 |
| PYCARD    | -2.33 | -2.45 | -2.15 | -1.14 |
| PYGL      | 1.03  | -1.62 | 1.24  | -2.02 |
| QARS      | -1.70 | -2.15 | -1.39 | -1.55 |
| QKI       | 1.29  | 1.54  | -1.83 | 2.83  |
| QRICH1    | -1.77 | -2.19 | -1.69 | -1.30 |
| QSK       | 1.79  | 2.07  | -1.16 | 2.39  |
| RAB11FIP1 | -3.26 | -3.63 | -3.03 | -1.20 |
| RAB11FIP2 | -1.63 | -2.54 | -1.38 | -1.84 |
| RAB11FIP4 | -2.28 | -2.09 | -1.85 | -1.13 |
| RAB18     | -1.67 | -2.27 | -2.06 | -1.10 |
| RAB1A     | 1.46  | 1.37  | -1.59 | 2.18  |
| RAB20     | 2.76  | 3.56  | 1.65  | 2.16  |
| RAB21     | 1.69  | 1.91  | -1.09 | 2.08  |
| RAB2A     | -1.38 | -1.44 | -2.66 | 1.85  |
| RAB37     | -3.87 | -4.79 | -3.88 | -1.23 |
| RAB7L1    | 3.98  | 2.24  | 2.57  | -1.14 |
| RAB8A     | -1.60 | -1.41 | -2.00 | 1.42  |
| RABEP1    | -1.76 | -1.65 | -2.08 | 1.26  |
| RABGEF1   | 3.24  | 2.25  | 2.63  | -1.17 |
| RABL2B    | -2.06 | -1.97 | -1.76 | -1.12 |
| RAC1      | -1.57 | -1.35 | -2.31 | 1.71  |
| RAF1      | -1.76 | -1.71 | -2.56 | 1.50  |
| RALGDS    | 4.24  | 5.91  | 1.59  | 3.71  |
| RALGPS2   | -1.20 | -2.10 | -1.62 | -1.29 |
| RANBP2    | 3.18  | 3.20  | 1.13  | 2.83  |
| RAP1A     | -1.53 | -1.38 | -2.38 | 1.73  |
| RAP1B     | 2.45  | 1.75  | 1.04  | 1.69  |
| RAPGEF2   | 1.37  | 1.35  | -1.75 | 2.36  |
| RASA1     | -1.54 | -2.07 | -1.88 | -1.10 |
| RASA3     | -2.14 | -2.17 | -2.30 | 1.06  |
| RASGRP2   | -1.65 | -2.09 | -1.50 | -1.39 |
| RASSF3    | -1.69 | -1.84 | -2.64 | 1.44  |
| RBBP5     | -1.85 | -1.60 | -2.08 | 1.30  |

|         |       |       |       |       |
|---------|-------|-------|-------|-------|
| RBBP7   | -2.08 | -1.97 | -2.03 | 1.03  |
| RBM15   | -1.79 | -2.21 | -1.72 | -1.29 |
| RBM18   | -1.56 | -1.46 | -2.04 | 1.40  |
| RBM25   | -1.30 | -1.39 | -2.50 | 1.80  |
| RBM26   | -2.02 | -2.36 | -2.13 | -1.11 |
| RBM43   | 1.13  | 2.02  | -1.36 | 2.75  |
| RBM4B   | -2.86 | -2.65 | -2.66 | 1.00  |
| RCBTB2  | -3.39 | -3.45 | -4.31 | 1.25  |
| RCHY1   | 2.36  | 1.52  | 1.68  | -1.11 |
| RCOR1   | -1.97 | -2.56 | -2.15 | -1.19 |
| RCOR3   | -1.47 | -2.04 | -1.81 | -1.12 |
| RCSD1   | -2.29 | -1.80 | -1.92 | 1.07  |
| REEP3   | -1.71 | -2.42 | -2.10 | -1.15 |
| RELA    | 1.78  | 2.24  | 1.26  | 1.78  |
| RELB    | 2.31  | 2.21  | 1.63  | 1.36  |
| RELL1   | -2.71 | -2.18 | -3.51 | 1.61  |
| REM2    | -1.94 | -1.81 | -2.67 | 1.47  |
| REST    | -1.81 | -2.06 | -1.86 | -1.11 |
| REV3L   | -1.77 | -1.64 | -2.82 | 1.73  |
| RFWD2   | -1.24 | -1.74 | -3.12 | 1.79  |
| RFX5    | 1.97  | 2.18  | 1.30  | 1.67  |
| RGS14   | -2.23 | -2.56 | -1.63 | -1.57 |
| RHBDF2  | 2.00  | 2.35  | 1.35  | 1.75  |
| RHOA    | 1.32  | 1.26  | -1.61 | 2.03  |
| RHOH    | 7.06  | 9.92  | 2.84  | 3.50  |
| RICTOR  | -1.27 | -1.12 | -3.26 | 2.92  |
| RIF1    | 1.55  | 1.37  | -1.61 | 2.21  |
| RIPK1   | 1.20  | 1.20  | -1.97 | 2.37  |
| RIPK2   | 2.64  | 3.09  | -1.47 | 4.56  |
| RIT1    | -1.24 | -1.01 | -2.19 | 2.18  |
| RLF     | 1.17  | 1.36  | -1.73 | 2.35  |
| RMI1    | -2.33 | -2.48 | -2.70 | 1.09  |
| RNASE6  | -2.90 | -2.52 | -3.44 | 1.37  |
| RNASET2 | -2.17 | -1.94 | -3.71 | 1.91  |
| RNF103  | -2.07 | -1.79 | -3.00 | 1.68  |
| RNF114  | -1.91 | -1.58 | -2.07 | 1.31  |
| RNF122  | -1.59 | -2.00 | -2.28 | 1.14  |
| RNF125  | -3.01 | -3.21 | -3.31 | 1.03  |
| RNF130  | -1.46 | -1.40 | -2.28 | 1.63  |
| RNF135  | -1.79 | -2.03 | -1.96 | -1.04 |
| RNF14   | -2.33 | -2.00 | -2.32 | 1.16  |
| RNF141  | -1.66 | -1.63 | -2.24 | 1.38  |
| RNF144B | 1.92  | 2.22  | -1.03 | 2.28  |
| RNF160  | -1.51 | -1.57 | -2.05 | 1.31  |
| RNF166  | -2.68 | -2.74 | -2.52 | -1.09 |
| RNF19B  | 1.10  | 1.33  | -1.81 | 2.41  |
| RNF20   | -1.87 | -1.89 | -2.15 | 1.14  |
| RNF38   | -1.51 | -2.17 | -1.51 | -1.44 |
| RNF44   | -1.60 | -2.07 | -1.54 | -1.34 |
| RNPEP   | -1.83 | -1.93 | -2.02 | 1.05  |

|              |       |       |       |       |
|--------------|-------|-------|-------|-------|
| RNPS1        | -2.20 | -1.87 | -1.38 | -1.35 |
| ROCK2        | -1.44 | -2.02 | -1.92 | -1.05 |
| ROPN1L       | -1.03 | -1.80 | 1.12  | -2.02 |
| RP6-213H19.1 | 1.08  | 1.55  | -1.48 | 2.30  |
| RPAP3        | -5.59 | -4.26 | -6.67 | 1.57  |
| RPGR         | 1.01  | 1.07  | -2.18 | 2.33  |
| RPL15        | -2.39 | -2.46 | -2.88 | 1.17  |
| RPL17        | -1.61 | -1.61 | -2.11 | 1.32  |
| RPL23AP32    | -1.93 | -1.40 | -2.51 | 1.79  |
| RPL23AP64    | -1.64 | -1.70 | -2.66 | 1.57  |
| RPL28        | -1.10 | -1.30 | -2.22 | 1.72  |
| RPL35        | -2.15 | -2.11 | -1.98 | -1.06 |
| RPL41        | -1.74 | -1.69 | -2.17 | 1.28  |
| RPL6         | -2.00 | -2.33 | -1.73 | -1.34 |
| RPL9         | -1.83 | -1.84 | -2.41 | 1.31  |
| RPN1         | -2.47 | -1.95 | -3.10 | 1.59  |
| RPP38        | -2.35 | -1.87 | -2.25 | 1.20  |
| RPRD1A       | -2.52 | -2.60 | -2.78 | 1.07  |
| RPS6KA2      | 1.33  | 1.06  | 2.11  | -1.99 |
| RPS6KA3      | -1.16 | -1.67 | -2.10 | 1.26  |
| RPS6KA5      | -5.09 | -5.07 | -7.33 | 1.45  |
| RRAGC        | -1.85 | -1.47 | -2.10 | 1.43  |
| RRM2B        | -1.56 | -1.84 | -2.52 | 1.37  |
| RRP12        | -2.56 | -2.70 | -2.18 | -1.24 |
| RSAD2        | 1.18  | 1.95  | -2.04 | 3.97  |
| RSBN1        | 2.23  | 1.40  | 1.95  | -1.39 |
| RSBN1L       | -2.89 | -2.90 | -4.14 | 1.43  |
| RSL1D1       | -1.90 | -1.99 | -2.27 | 1.14  |
| RTCD1        | -1.98 | -2.02 | -1.77 | -1.14 |
| RTF1         | -2.13 | -3.17 | -1.84 | -1.72 |
| RUFY1        | -1.46 | 1.01  | -1.99 | 2.01  |
| RUNDC1       | -1.14 | -1.73 | 1.52  | -2.63 |
| RUNX2        | -3.38 | -3.99 | -4.02 | 1.01  |
| RWDD4A       | -2.22 | -2.24 | -1.59 | -1.40 |
| RYBP         | -1.55 | -1.56 | -2.24 | 1.44  |
| S100A10      | -4.42 | -4.91 | -7.24 | 1.48  |
| S1PR1        | 2.31  | 1.25  | 2.73  | -2.19 |
| SACM1L       | -2.45 | -3.15 | -2.48 | -1.27 |
| SAMD9        | 1.37  | 1.46  | -1.75 | 2.55  |
| SAMD9L       | 1.67  | 1.76  | -1.30 | 2.28  |
| SAMHD1       | 2.76  | 3.00  | 1.03  | 2.92  |
| SAMSN1       | 8.97  | 7.97  | 5.58  | 1.43  |
| SAP130       | -2.40 | -2.99 | -2.33 | -1.28 |
| SAPS1        | -1.66 | -2.09 | -1.44 | -1.45 |
| SAR1B        | -1.80 | -1.37 | -2.24 | 1.64  |
| SARS         | -1.84 | -2.34 | -1.83 | -1.28 |
| SART1        | 2.10  | 1.27  | -2.12 | 2.69  |
| SART3        | -2.09 | -1.42 | -1.48 | 1.04  |
| SASS6        | -2.08 | -2.10 | -2.29 | 1.09  |
| SBF2         | -1.08 | -1.63 | -2.02 | 1.24  |

|           |       |       |       |       |
|-----------|-------|-------|-------|-------|
| SC4MOL    | 2.04  | 1.20  | 1.91  | -1.59 |
| SCAMP1    | -3.06 | -3.63 | -3.20 | -1.13 |
| SCAP      | -2.41 | -2.19 | -2.36 | 1.08  |
| SCLT1     | -1.83 | -1.78 | -3.91 | 2.19  |
| SCRN3     | -2.27 | -1.79 | -3.14 | 1.76  |
| SDC2      | -2.26 | -1.97 | -2.18 | 1.10  |
| SDHA      | -1.38 | -2.02 | -1.35 | -1.50 |
| SDHB      | -1.60 | -1.86 | -2.41 | 1.30  |
| SEC14L1   | -1.65 | -1.44 | -2.21 | 1.54  |
| SEC22B    | 2.45  | 2.47  | 1.14  | 2.18  |
| SEC23A    | -1.53 | -2.41 | -1.26 | -1.91 |
| SEC24A    | 1.31  | 1.47  | -1.44 | 2.12  |
| SEC24D    | -1.71 | -1.49 | -3.22 | 2.17  |
| SEC61A2   | -1.68 | -1.51 | -2.34 | 1.55  |
| SECISBP2  | -1.28 | -1.09 | -2.31 | 2.11  |
| SELPLG    | -1.69 | -2.18 | -1.42 | -1.53 |
| SEMA4D    | -2.16 | -2.14 | -2.24 | 1.05  |
| SENP6     | -2.04 | -2.33 | -3.03 | 1.30  |
| SENP7     | -1.21 | -2.07 | -2.09 | 1.01  |
| SERBP1    | -2.90 | -2.82 | -3.80 | 1.35  |
| SERPINB1  | 2.03  | 1.92  | 1.44  | 1.34  |
| SERPINB10 | 1.19  | 1.19  | 2.84  | -2.39 |
| SERPINB9  | 3.83  | 6.78  | 1.48  | 4.58  |
| SERPING1  | -1.13 | 1.17  | -2.74 | 3.21  |
| SERTAD2   | 2.30  | 2.85  | -1.10 | 3.14  |
| SESN3     | -3.63 | -3.99 | -3.66 | -1.09 |
| SESTD1    | 1.07  | 1.49  | -1.59 | 2.37  |
| SET       | -4.31 | -3.65 | -5.11 | 1.40  |
| SETD2     | -1.60 | -1.98 | -2.08 | 1.05  |
| SETD3     | -1.73 | -2.16 | -1.80 | -1.20 |
| SETX      | -1.66 | -1.71 | -2.81 | 1.64  |
| SFRS2IP   | -1.39 | -1.40 | -2.46 | 1.76  |
| SFRS3     | 1.07  | 1.01  | -2.10 | 2.13  |
| SFRS7     | -1.35 | -1.16 | -2.17 | 1.87  |
| SFXN1     | 1.48  | -1.01 | 2.00  | -2.02 |
| SGK1      | -1.40 | 1.12  | -2.66 | 2.97  |
| SGK196    | -2.00 | -2.03 | -2.59 | 1.28  |
| SGPP2     | 11.43 | 14.14 | 4.80  | 2.95  |
| SH2B3     | -2.12 | -1.26 | -2.10 | 1.67  |
| SH2D3A    | 3.11  | 3.09  | 2.16  | 1.43  |
| SH3BP5    | 2.78  | 1.92  | 1.90  | 1.01  |
| SIGLEC10  | -1.76 | 1.16  | -2.91 | 3.39  |
| SIPA1L2   | 2.30  | 1.00  | 2.00  | -1.99 |
| SIRPB2    | -2.10 | -2.87 | -2.51 | -1.14 |
| SIRPD     | -1.68 | -2.08 | -1.71 | -1.21 |
| SIRT1     | -2.10 | -1.60 | -2.74 | 1.71  |
| SLAMF1    | 2.09  | 1.99  | 1.38  | 1.43  |
| SLAMF6    | -3.48 | -2.02 | -3.96 | 1.96  |
| SLAMF7    | 12.87 | 18.33 | 3.44  | 5.33  |
| SLAMF8    | 1.76  | 3.31  | 1.30  | 2.55  |

|          |       |       |       |       |
|----------|-------|-------|-------|-------|
| SLBP     | -5.43 | -5.96 | -6.15 | 1.03  |
| SLC11A2  | 6.76  | 7.74  | 2.66  | 2.91  |
| SLC15A4  | -3.48 | -1.49 | -5.33 | 3.57  |
| SLC16A5  | -2.18 | -2.02 | -2.05 | 1.02  |
| SLC16A6  | -2.93 | -2.43 | -3.30 | 1.36  |
| SLC17A5  | -1.94 | -2.19 | -1.97 | -1.11 |
| SLC1A3   | 8.62  | 3.92  | 5.31  | -1.35 |
| SLC20A1  | 1.66  | 2.17  | -1.04 | 2.26  |
| SLC22A15 | -1.40 | -2.38 | -1.39 | -1.71 |
| SLC23A2  | -1.96 | -2.30 | -2.26 | -1.02 |
| SLC25A1  | -1.86 | -2.05 | -1.79 | -1.14 |
| SLC25A13 | -1.34 | 1.50  | -1.52 | 2.28  |
| SLC25A20 | -1.83 | -2.18 | -1.34 | -1.63 |
| SLC25A3  | -1.89 | -2.04 | -1.76 | -1.16 |
| SLC25A40 | 2.43  | 1.06  | 2.32  | -2.19 |
| SLC25A46 | -1.80 | -2.18 | -1.80 | -1.21 |
| SLC29A1  | 1.46  | 2.15  | 1.04  | 2.08  |
| SLC30A7  | 2.71  | 1.74  | 2.04  | -1.17 |
| SLC31A1  | -2.99 | -2.54 | -2.83 | 1.11  |
| SLC31A2  | -1.41 | -1.13 | -2.32 | 2.06  |
| SLC35B2  | 1.74  | 2.26  | 1.20  | 1.88  |
| SLC35E1  | -2.64 | -2.68 | -2.26 | -1.18 |
| SLC35E3  | -1.75 | -1.06 | -2.76 | 2.60  |
| SLC36A1  | -1.95 | -2.05 | -1.81 | -1.13 |
| SLC36A4  | 2.41  | 1.64  | 2.22  | -1.35 |
| SLC37A3  | 2.47  | 1.32  | 2.23  | -1.69 |
| SLC38A1  | -1.94 | 1.09  | -2.79 | 3.03  |
| SLC39A6  | -2.38 | -2.06 | -2.78 | 1.35  |
| SLC39A8  | 5.34  | 4.40  | 4.61  | -1.05 |
| SLC40A1  | -2.99 | -4.96 | -2.30 | -2.16 |
| SLC43A3  | 3.11  | 5.75  | 1.65  | 3.49  |
| SLC44A2  | -1.73 | -2.07 | -1.74 | -1.19 |
| SLC5A3   | -2.12 | -1.62 | -2.03 | 1.25  |
| SLC7A5   | 2.59  | 2.79  | 1.59  | 1.75  |
| SLC7A6   | -2.29 | -2.52 | -2.43 | -1.04 |
| SLC7A7   | -3.64 | -1.75 | -3.31 | 1.89  |
| SLC8A1   | -2.21 | -2.09 | -3.77 | 1.80  |
| SLC9A3R1 | -2.49 | -3.00 | -1.96 | -1.53 |
| SLC9A6   | -1.40 | -2.24 | 1.05  | -2.35 |
| SLCO4C1  | -1.33 | -2.24 | -1.11 | -2.02 |
| SLFN5    | -1.01 | 1.24  | -1.99 | 2.48  |
| SLMAP    | -1.44 | -2.51 | -1.90 | -1.32 |
| SLMO2    | -1.32 | -1.13 | -2.09 | 1.84  |
| SLPI     | -2.13 | 1.88  | -4.50 | 8.46  |
| SLTM     | -2.14 | -2.79 | -1.88 | -1.49 |
| SLU7     | 1.04  | 1.08  | -2.35 | 2.54  |
| SMAD2    | -2.04 | -2.75 | -2.01 | -1.37 |
| SMAD3    | 2.06  | 2.28  | 1.51  | 1.50  |
| SMARCA2  | -2.04 | -2.97 | -2.35 | -1.27 |
| SMARCA5  | -1.70 | -1.62 | -2.57 | 1.59  |

|          |       |       |       |       |
|----------|-------|-------|-------|-------|
| SMARCC2  | -2.18 | -2.74 | -2.12 | -1.29 |
| SMC3     | -3.15 | -2.91 | -2.99 | 1.03  |
| SMCHD1   | -1.93 | -1.75 | -5.46 | 3.13  |
| SMG7     | 1.26  | 1.55  | -1.50 | 2.33  |
| SMNDC1   | -1.32 | -1.29 | -2.06 | 1.60  |
| SMPDL3A  | 2.11  | 1.35  | 2.17  | -1.61 |
| SMURF2   | -1.74 | -2.25 | -2.18 | -1.03 |
| SNAP29   | -1.90 | -2.37 | -1.78 | -1.34 |
| SNAPC5   | -2.56 | -5.53 | -2.91 | -1.90 |
| SNORD49A | 2.08  | 1.23  | 2.18  | -1.78 |
| SNRK     | -1.76 | -1.64 | -2.27 | 1.38  |
| SNRNP200 | -1.44 | -1.58 | -2.01 | 1.28  |
| SNRNP48  | -2.46 | -3.20 | -3.05 | -1.05 |
| SNTB2    | -1.50 | -2.03 | -1.24 | -1.64 |
| SNX10    | 1.25  | 1.43  | -1.62 | 2.31  |
| SNX13    | -1.14 | -1.36 | -2.11 | 1.55  |
| SNX2     | -2.18 | -2.12 | -3.81 | 1.79  |
| SNX3     | 1.76  | -1.08 | 2.80  | -3.03 |
| SOCS3    | 4.60  | 5.05  | 3.14  | 1.61  |
| SORT1    | 2.36  | 1.65  | 1.90  | -1.16 |
| SP140    | 1.47  | 1.67  | -1.45 | 2.42  |
| SP140L   | 1.20  | 1.46  | -1.42 | 2.07  |
| SPAG7    | 1.11  | 1.44  | -1.44 | 2.07  |
| SPAG9    | -1.46 | -1.03 | -2.89 | 2.80  |
| SPAST    | -1.94 | -2.17 | -2.86 | 1.31  |
| SPATA6   | -1.91 | -1.55 | -2.24 | 1.44  |
| SPATC1   | 2.01  | 1.82  | 1.66  | 1.10  |
| SPCS3    | -1.55 | -1.91 | -2.18 | 1.14  |
| SPEN     | -2.72 | -2.19 | -2.57 | 1.17  |
| SPINT2   | 2.50  | 2.69  | 2.21  | 1.22  |
| SPOP     | -1.67 | -1.61 | -2.18 | 1.36  |
| SPOPL    | -1.44 | -2.07 | -2.55 | 1.23  |
| SPP1     | 3.10  | 1.62  | 1.23  | 1.32  |
| SPRED2   | 2.06  | 1.56  | -1.00 | 1.56  |
| SPRYD3   | -2.84 | -2.64 | -2.21 | -1.20 |
| SPTLC2   | -1.03 | -2.05 | 1.15  | -2.34 |
| SQSTM1   | 1.23  | 1.73  | -1.30 | 2.25  |
| SRP14    | -1.16 | -1.63 | -3.44 | 2.11  |
| SRP72    | -2.03 | -1.74 | -2.03 | 1.17  |
| SRPK2    | -2.10 | -2.88 | -3.66 | 1.27  |
| SRXN1    | -2.96 | -1.71 | -4.48 | 2.62  |
| SSBP2    | -1.35 | -1.68 | -2.40 | 1.43  |
| SSBP4    | -1.73 | -1.79 | -2.04 | 1.14  |
| SSNA1    | -2.25 | -2.34 | -2.02 | -1.16 |
| SSR3     | -2.22 | -2.31 | -1.98 | -1.17 |
| ST3GAL4  | 2.16  | 1.70  | 1.39  | 1.22  |
| ST3GAL6  | -3.72 | -2.72 | -4.63 | 1.70  |
| ST6GAL1  | -2.75 | -3.13 | -2.67 | -1.17 |
| ST8SIA4  | -1.31 | -1.46 | -3.50 | 2.40  |
| STAG1    | -1.19 | -1.60 | -2.26 | 1.41  |

|          |       |       |       |       |
|----------|-------|-------|-------|-------|
| STAM     | -1.78 | -2.29 | -1.48 | -1.55 |
| STAM2    | -1.09 | -1.14 | -2.09 | 1.84  |
| STAMBP   | -1.56 | -1.47 | -2.12 | 1.44  |
| STAP1    | -1.87 | -1.68 | -2.58 | 1.54  |
| STARD3NL | -1.38 | 1.78  | -1.85 | 3.29  |
| STARD7   | -2.74 | -1.97 | -2.06 | 1.05  |
| STAT1    | 1.21  | 1.45  | -1.62 | 2.34  |
| STAT2    | 1.58  | 2.11  | -1.31 | 2.76  |
| STAT4    | 2.25  | 2.17  | 1.11  | 1.96  |
| STAT5A   | 1.75  | 1.95  | -1.03 | 2.00  |
| STIM2    | -1.90 | -2.17 | -1.98 | -1.10 |
| STIP1    | 1.21  | 1.88  | -1.15 | 2.16  |
| STK10    | -1.57 | -1.60 | -2.03 | 1.27  |
| STK38L   | -1.87 | -2.36 | -2.07 | -1.14 |
| STK40    | -1.40 | -1.13 | -2.06 | 1.84  |
| STOM     | 5.86  | 4.00  | 6.09  | -1.52 |
| STRN4    | -2.37 | -2.14 | -2.24 | 1.04  |
| STT3A    | -2.01 | -1.29 | -1.62 | 1.25  |
| STT3B    | -1.93 | -2.29 | -2.35 | 1.02  |
| STX10    | -2.31 | -2.88 | -2.17 | -1.33 |
| STX6     | -1.74 | -2.02 | -2.25 | 1.12  |
| STX7     | -1.38 | -1.85 | -2.40 | 1.30  |
| STXBP3   | -1.01 | -1.27 | -2.54 | 2.00  |
| STYX     | -3.09 | -4.06 | -2.67 | -1.52 |
| SULF2    | -1.83 | -2.50 | -3.23 | 1.29  |
| SULT1A2  | -1.37 | -2.07 | -1.16 | -1.79 |
| SULT1B1  | -1.23 | -2.88 | -1.27 | -2.27 |
| SUMO1P1  | -1.52 | -1.57 | -2.14 | 1.36  |
| SUMO2    | -1.86 | -2.41 | -2.40 | -1.00 |
| SUPT16H  | -2.47 | -2.48 | -2.72 | 1.10  |
| SUSD3    | 1.48  | 1.17  | 2.27  | -1.94 |
| SUZ12    | -1.90 | -2.15 | -2.53 | 1.18  |
| SYF2     | -1.15 | -1.16 | -2.35 | 2.02  |
| SYK      | -2.20 | -2.09 | -2.13 | 1.02  |
| SYNE1    | 3.29  | 1.57  | 3.72  | -2.37 |
| TACC1    | -2.57 | -2.10 | -2.97 | 1.42  |
| TACC3    | -1.90 | -2.41 | -2.45 | 1.02  |
| TAF12    | -1.61 | -1.67 | -2.09 | 1.25  |
| TAF1D    | -1.39 | -1.64 | -2.40 | 1.46  |
| TAGAP    | -1.18 | -1.03 | -2.03 | 1.97  |
| TAGLN2   | -1.90 | -1.61 | -2.20 | 1.36  |
| TANK     | 1.55  | 2.06  | -1.74 | 3.59  |
| TAOK3    | -1.72 | -2.03 | -2.27 | 1.12  |
| TAP2     | -1.13 | 1.16  | -1.98 | 2.29  |
| TAPBPL   | -2.16 | -1.62 | -2.84 | 1.75  |
| TAPT1    | -2.04 | -2.14 | -1.96 | -1.09 |
| TARDBP   | -1.36 | -2.02 | -2.18 | 1.08  |
| TAX1BP3  | -1.89 | -1.78 | -2.40 | 1.35  |
| TBC1D1   | -1.92 | -2.45 | -2.78 | 1.13  |
| TBC1D15  | 2.24  | 1.70  | 1.18  | 1.44  |



|          |       |       |       |       |
|----------|-------|-------|-------|-------|
| TBC1D23  | -1.02 | 1.08  | -1.87 | 2.01  |
| TBC1D8   | 4.80  | 2.35  | 5.47  | -2.33 |
| TBK1     | 1.41  | 1.77  | -1.50 | 2.65  |
| TBL1XR1  | -1.24 | -1.46 | -2.25 | 1.54  |
| TBP      | -2.13 | -2.03 | -2.08 | 1.03  |
| TC2N     | -2.01 | -2.30 | -2.28 | -1.01 |
| TCEB3    | -2.05 | -1.54 | -1.73 | 1.12  |
| TCF7L2   | 2.43  | 2.63  | 1.65  | 1.59  |
| TCFL5    | 1.00  | 2.45  | -1.78 | 4.37  |
| TCN1     | 1.81  | 1.08  | 2.41  | -2.22 |
| TCP11L2  | -1.72 | -2.32 | -1.97 | -1.18 |
| TCTN1    | -2.50 | -2.14 | -2.45 | 1.15  |
| TESK2    | 1.67  | 1.69  | -1.27 | 2.15  |
| TFDP1    | 2.34  | 1.27  | 2.85  | -2.24 |
| TFDP2    | 3.11  | 1.33  | 3.42  | -2.58 |
| TFEB     | -2.04 | -2.03 | -2.18 | 1.07  |
| TFEC     | 5.63  | 13.99 | 1.82  | 7.68  |
| TFRC     | 6.88  | 7.00  | 3.02  | 2.32  |
| TGFBR1   | -2.33 | -3.17 | -1.54 | -2.07 |
| TGIF2    | 1.67  | 2.05  | 1.03  | 2.00  |
| THAP5    | 1.04  | 1.08  | -1.89 | 2.03  |
| THAP6    | -1.58 | -1.53 | -2.35 | 1.53  |
| THBD     | -2.23 | -1.62 | -3.34 | 2.05  |
| THOC7    | 1.14  | -1.07 | -2.16 | 2.02  |
| TICAM2   | -1.96 | -1.77 | -2.33 | 1.32  |
| TIFA     | 8.76  | 8.80  | 3.03  | 2.91  |
| TIGD1    | -2.02 | -1.30 | -2.07 | 1.60  |
| TIGD3    | -3.60 | -3.19 | -2.64 | -1.21 |
| TIMM23   | -2.10 | -2.14 | -1.86 | -1.15 |
| TIMM8B   | -2.32 | -1.95 | -2.02 | 1.04  |
| TIMP1    | -1.14 | 1.03  | -2.00 | 2.06  |
| TIMP2    | -1.82 | -2.43 | -1.56 | -1.56 |
| TKT      | -1.57 | -2.56 | -1.47 | -1.75 |
| TLR1     | 1.17  | 1.16  | -1.88 | 2.19  |
| TLR10    | -1.54 | -1.35 | -2.40 | 1.78  |
| TLR2     | 1.38  | 1.70  | -1.77 | 3.00  |
| TLR5     | 3.39  | 2.73  | 1.88  | 1.45  |
| TLR6     | -1.34 | -1.56 | -2.62 | 1.68  |
| TMCC1    | -1.94 | -1.11 | -4.83 | 4.36  |
| TMCC3    | -1.81 | -2.04 | -1.71 | -1.19 |
| TMED10   | -2.10 | -1.48 | -1.76 | 1.19  |
| TMED2    | -1.41 | -1.54 | -2.02 | 1.31  |
| TMED8    | 2.38  | 1.20  | 2.42  | -2.02 |
| TMEM111  | -1.43 | -1.46 | -2.05 | 1.40  |
| TMEM120B | -3.26 | -2.24 | -2.74 | 1.22  |
| TMEM140  | 1.23  | 1.41  | -1.57 | 2.22  |
| TMEM14B  | -2.31 | -2.41 | -1.85 | -1.30 |
| TMEM164  | -1.84 | -1.97 | -2.54 | 1.29  |
| TMEM165  | 2.45  | 2.44  | 1.20  | 2.04  |
| TMEM185B | 2.30  | 2.60  | 1.89  | 1.37  |

|           |       |       |       |       |
|-----------|-------|-------|-------|-------|
| TMEM188   | -1.35 | -1.41 | -2.05 | 1.45  |
| TMEM205   | 2.18  | 2.31  | 1.79  | 1.29  |
| TMEM216   | -2.37 | -2.39 | -1.73 | -1.38 |
| TMEM222   | -2.28 | -1.90 | -2.07 | 1.09  |
| TMEM45B   | -1.95 | -2.34 | -1.90 | -1.23 |
| TMEM55A   | -2.21 | -2.88 | -2.43 | -1.18 |
| TMEM65    | -1.69 | -2.35 | -1.68 | -1.40 |
| TMEM66    | -1.66 | -1.63 | -2.04 | 1.25  |
| TMEM9B    | -1.89 | -2.06 | -1.71 | -1.21 |
| TMF1      | 1.03  | 1.08  | -1.89 | 2.05  |
| TMLHE     | -1.65 | -2.14 | -1.83 | -1.17 |
| TMOD2     | -1.11 | 1.07  | -2.64 | 2.82  |
| TMX1      | -1.94 | -2.53 | -1.79 | -1.41 |
| TMX4      | -2.03 | -2.54 | -2.33 | -1.09 |
| TNFAIP2   | 1.26  | 1.62  | -1.63 | 2.64  |
| TNFAIP3   | 5.73  | 6.38  | 2.38  | 2.69  |
| TNFAIP6   | 3.76  | 4.01  | 2.03  | 1.97  |
| TNFRSF10B | -1.40 | 1.12  | -2.57 | 2.87  |
| TNFRSF10D | 3.25  | 3.29  | 2.22  | 1.48  |
| TNFRSF9   | -3.00 | -1.52 | -3.76 | 2.48  |
| TNIP1     | 2.29  | 2.94  | 1.33  | 2.21  |
| TNPO1     | -1.97 | -2.24 | -2.69 | 1.20  |
| TNRC6B    | -1.34 | -2.11 | -1.59 | -1.32 |
| TOB1      | -1.44 | -2.08 | -1.10 | -1.88 |
| TOM1      | 1.47  | 2.02  | -1.15 | 2.32  |
| TOM1L2    | -1.72 | -2.11 | -1.64 | -1.28 |
| TOP3A     | -1.80 | -2.14 | -1.71 | -1.25 |
| TOPBP1    | -1.41 | -2.61 | -1.54 | -1.70 |
| TOPORS    | 1.08  | 1.26  | -2.13 | 2.68  |
| TP53I11   | 1.05  | -1.65 | 1.36  | -2.24 |
| TP53INP1  | -2.27 | -2.13 | -2.61 | 1.23  |
| TPP2      | -1.84 | -2.02 | -2.00 | -1.01 |
| TPR       | -1.12 | -1.34 | -2.86 | 2.13  |
| TPRG1L    | -2.43 | -2.52 | -2.38 | -1.06 |
| TPST1     | -1.64 | -1.92 | -2.72 | 1.42  |
| TRAF1     | 1.87  | 2.85  | 1.39  | 2.05  |
| TRAF3     | 2.31  | 2.78  | 1.40  | 1.99  |
| TRAK2     | -2.22 | -2.36 | -2.38 | 1.01  |
| TRAM1     | -1.96 | -1.82 | -2.26 | 1.25  |
| TRAT1     | -1.86 | -2.10 | -2.10 | -1.00 |
| TREM1     | -1.08 | 1.07  | -2.46 | 2.64  |
| TRERF1    | -2.11 | -2.05 | -2.01 | -1.02 |
| TRIAP1    | -1.23 | -1.68 | -2.01 | 1.20  |
| TRIB1     | 2.31  | 2.00  | 2.31  | -1.15 |
| TRIM24    | -3.08 | -3.04 | -3.75 | 1.23  |
| TRIM27    | -1.93 | -2.39 | -2.34 | -1.02 |
| TRIM33    | -1.82 | -2.02 | -2.37 | 1.17  |
| TRIM5     | 1.76  | 1.83  | -1.22 | 2.24  |
| TRIM8     | -2.08 | -2.83 | -2.85 | 1.01  |
| TRIP10    | 1.75  | 2.54  | 1.19  | 2.14  |

|           |       |       |       |       |
|-----------|-------|-------|-------|-------|
| TRMT112   | -1.73 | -1.50 | -2.59 | 1.72  |
| TRPM7     | -1.38 | -1.04 | -2.11 | 2.02  |
| TRPS1     | 4.10  | 1.59  | 6.56  | -4.13 |
| TSC22D3   | -2.00 | -1.58 | -2.03 | 1.29  |
| TSHZ3     | -1.42 | -2.18 | -1.54 | -1.42 |
| TSPAN2    | -2.22 | -2.92 | -2.39 | -1.22 |
| TST       | -2.65 | -2.70 | -2.38 | -1.13 |
| TTC1      | -1.37 | -1.37 | -2.09 | 1.53  |
| TTL       | 1.88  | 2.94  | 1.09  | 2.68  |
| TTLL4     | -1.10 | 1.34  | -2.09 | 2.81  |
| TTRAP     | -1.96 | -1.36 | -4.22 | 3.10  |
| TUBA4A    | -1.50 | -2.35 | 1.04  | -2.45 |
| TUBD1     | 2.12  | 1.44  | 1.64  | -1.14 |
| TUBG1     | 1.04  | -1.20 | 1.72  | -2.06 |
| TUBGCP3   | -3.51 | -3.40 | -3.58 | 1.05  |
| TUSC4     | -2.26 | -2.26 | -2.31 | 1.02  |
| TWF2      | -2.37 | -2.38 | -1.91 | -1.25 |
| TWSG1     | 2.08  | 2.61  | 1.21  | 2.16  |
| TXNDC12   | -1.82 | -1.67 | -2.74 | 1.64  |
| TXNDC3    | 2.70  | 1.59  | 1.22  | 1.30  |
| TXNRD1    | -2.52 | -1.84 | -3.17 | 1.72  |
| UBA3      | 1.09  | -1.29 | -2.16 | 1.68  |
| UBA6      | 2.16  | 1.14  | 1.37  | -1.20 |
| UBASH3B   | -2.14 | -1.54 | -2.11 | 1.37  |
| UBE2E1    | 4.58  | 5.14  | 3.06  | 1.68  |
| UBE2F     | 2.37  | -1.47 | 1.48  | -2.17 |
| UBE2G1    | -1.88 | -2.27 | -2.14 | -1.06 |
| UBE2L6    | 1.13  | 1.47  | -1.43 | 2.10  |
| UBE4B     | -1.86 | -2.41 | -1.98 | -1.22 |
| UBN1      | -1.67 | -2.03 | -1.98 | -1.03 |
| UBR1      | 2.57  | 1.77  | 1.85  | -1.04 |
| UBR2      | -1.48 | -1.50 | -3.21 | 2.14  |
| UBR3      | -1.54 | -2.62 | -2.15 | -1.22 |
| UBR7      | -1.75 | -2.07 | -1.57 | -1.32 |
| UCP2      | -1.99 | -2.94 | -1.12 | -2.62 |
| UFD1L     | -1.78 | -2.02 | -2.13 | 1.05  |
| UGCG      | 7.06  | 4.12  | 5.98  | -1.45 |
| UGGT1     | -1.52 | -1.98 | -2.05 | 1.03  |
| UGP2      | 2.04  | 2.50  | -1.18 | 2.96  |
| UHRF1BP1L | -1.50 | -1.96 | -2.47 | 1.26  |
| UIMC1     | -1.39 | -1.75 | -2.12 | 1.21  |
| UNC119    | -1.82 | -1.68 | -2.04 | 1.22  |
| UNQ1887   | -1.74 | -1.60 | -2.07 | 1.29  |
| UNQ3104   | -1.27 | -2.43 | -1.21 | -2.01 |
| UNQ6228   | 1.59  | 2.01  | 1.02  | 1.97  |
| UNQ9368   | 4.05  | 3.13  | 1.84  | 1.70  |
| UPF2      | -1.59 | -1.96 | -2.46 | 1.25  |
| UPP1      | 4.45  | 3.86  | 4.06  | -1.05 |
| UQCRQ     | -1.81 | -1.72 | -2.26 | 1.32  |
| USF1      | -1.24 | -1.01 | -2.21 | 2.18  |

|         |       |       |       |       |
|---------|-------|-------|-------|-------|
| USO1    | -1.37 | -1.21 | -2.08 | 1.72  |
| USP21   | -2.12 | -2.24 | -1.95 | -1.15 |
| USP24   | -2.19 | -2.28 | -2.51 | 1.10  |
| USP25   | -1.35 | -1.50 | -2.31 | 1.53  |
| USP33   | -1.41 | -1.56 | -2.18 | 1.40  |
| USP4    | -1.78 | -1.60 | -2.61 | 1.63  |
| USP48   | -1.47 | -2.01 | -1.92 | -1.05 |
| USPL1   | -1.55 | -1.19 | -2.19 | 1.84  |
| UTP6    | -3.46 | -3.30 | -3.45 | 1.05  |
| UVRAG   | -1.22 | -1.21 | -2.07 | 1.71  |
| VAMP2   | -2.33 | -2.37 | -2.37 | 1.00  |
| VBP1    | -1.51 | -2.27 | -1.41 | -1.61 |
| VCL     | -1.30 | -2.22 | 1.06  | -2.34 |
| VDAC3   | -2.99 | -3.55 | -3.25 | -1.09 |
| VILL    | 2.63  | 3.02  | 1.57  | 1.93  |
| VIM     | -1.13 | -1.63 | 1.23  | -2.01 |
| VNN1    | 3.27  | 2.09  | 3.10  | -1.48 |
| VNN3    | 1.05  | -1.06 | -2.00 | 1.88  |
| VOPP1   | 1.91  | 2.11  | 1.28  | 1.65  |
| VPS24   | -1.62 | -1.58 | -2.41 | 1.52  |
| VPS26A  | -1.65 | -1.32 | -2.06 | 1.56  |
| VPS26B  | -2.29 | -2.96 | -2.00 | -1.48 |
| VPS37C  | -1.55 | -1.24 | -2.16 | 1.74  |
| VPS41   | -1.51 | -1.73 | -2.48 | 1.43  |
| VPS8    | -3.05 | -3.34 | -4.72 | 1.41  |
| VSTM1   | 1.24  | -1.13 | 2.16  | -2.45 |
| WDFY1   | -2.11 | -1.73 | -3.03 | 1.75  |
| WDFY2   | -1.73 | -2.04 | -1.62 | -1.26 |
| WDR26   | -1.16 | -1.42 | -2.18 | 1.54  |
| WDR47   | -2.20 | -2.61 | -2.13 | -1.23 |
| WDR82   | -2.36 | -1.99 | -3.30 | 1.66  |
| WHSC1L1 | -2.73 | -3.37 | -3.20 | -1.05 |
| WIPI1   | -1.84 | -2.67 | -1.12 | -2.38 |
| WNT3A   | 1.22  | 1.46  | -1.41 | 2.05  |
| WRB     | -3.80 | -3.65 | -2.92 | -1.25 |
| WTAP    | 1.26  | 1.60  | -1.41 | 2.26  |
| XBP1    | 4.30  | 5.41  | 2.69  | 2.01  |
| XKR8    | -2.20 | -2.29 | -2.14 | -1.07 |
| XPC     | -1.84 | -1.76 | -2.09 | 1.18  |
| XPO7    | -3.10 | -3.56 | -3.76 | 1.06  |
| XPOT    | -2.09 | -2.06 | -2.14 | 1.04  |
| XRCC1   | -1.81 | -2.20 | -1.47 | -1.50 |
| XRN1    | 1.83  | 1.60  | -1.29 | 2.07  |
| XRN2    | -2.23 | -2.71 | -3.11 | 1.15  |
| YIPF4   | 1.45  | 1.46  | -1.46 | 2.13  |
| YLPM1   | -2.00 | -2.39 | -2.03 | -1.18 |
| YPEL2   | -1.80 | -2.00 | -2.21 | 1.11  |
| YPEL5   | -1.62 | -1.77 | -2.10 | 1.19  |
| YTHDC1  | 1.01  | 1.04  | -2.19 | 2.28  |
| YWHAH   | -2.34 | -2.39 | -1.69 | -1.41 |

|         |       |       |       |       |
|---------|-------|-------|-------|-------|
| YY1     | -1.73 | -2.04 | -1.46 | -1.40 |
| ZBTB11  | -2.06 | -1.60 | -1.58 | -1.01 |
| ZBTB2   | -1.68 | -1.31 | -2.82 | 2.15  |
| ZBTB34  | -1.75 | -1.85 | -2.38 | 1.29  |
| ZC3H11A | 1.16  | 1.30  | -1.77 | 2.30  |
| ZC3H12A | 2.45  | 2.73  | 1.28  | 2.14  |
| ZC3HAV1 | 2.29  | 2.04  | 1.28  | 1.59  |
| ZCCHC2  | 1.44  | 1.55  | -1.53 | 2.37  |
| ZCCHC6  | -1.18 | -1.24 | -2.31 | 1.87  |
| ZDHHC7  | -1.82 | -2.00 | -1.89 | -1.06 |
| ZEB1    | -2.16 | -2.35 | -2.49 | 1.06  |
| ZEB2    | 1.72  | 2.25  | 1.15  | 1.95  |
| ZFAND5  | -1.69 | -1.39 | -3.14 | 2.26  |
| ZFP36L2 | -2.78 | -2.74 | -3.39 | 1.24  |
| ZHX2    | 2.24  | 2.76  | 1.08  | 2.55  |
| ZMIZ1   | -1.78 | -1.38 | -2.89 | 2.09  |
| ZMYM2   | -1.72 | -2.88 | -2.21 | -1.31 |
| ZMYND8  | -1.61 | -1.20 | -2.25 | 1.87  |
| ZNF136  | -1.43 | -1.30 | -2.21 | 1.70  |
| ZNF141  | -1.80 | -2.04 | -2.12 | 1.04  |
| ZNF146  | -2.35 | -2.08 | -1.91 | -1.09 |
| ZNF148  | -1.57 | -1.74 | -2.48 | 1.43  |
| ZNF18   | -2.34 | -2.06 | -2.95 | 1.43  |
| ZNF185  | -1.82 | -1.96 | -2.78 | 1.42  |
| ZNF217  | -1.87 | -2.43 | -2.21 | -1.10 |
| ZNF238  | -2.00 | -2.25 | -2.20 | -1.02 |
| ZNF250  | 2.08  | 1.92  | 1.34  | 1.43  |
| ZNF259  | 2.29  | 1.56  | 1.64  | -1.05 |
| ZNF266  | -1.66 | -2.03 | -2.08 | 1.02  |
| ZNF267  | 1.41  | 1.64  | -1.98 | 3.25  |
| ZNF277  | 1.59  | 1.77  | -1.18 | 2.09  |
| ZNF33A  | -1.87 | -1.97 | -3.07 | 1.56  |
| ZNF398  | -3.39 | -3.22 | -2.50 | -1.29 |
| ZNF417  | -1.13 | -1.34 | -2.15 | 1.61  |
| ZNF431  | -1.35 | -2.17 | -1.52 | -1.43 |
| ZNF480  | -2.17 | -2.26 | -2.31 | 1.02  |
| ZNF507  | -2.38 | -2.18 | -2.12 | -1.03 |
| ZNF552  | -1.81 | -2.34 | -2.12 | -1.10 |
| ZNF561  | -2.61 | -2.60 | -2.31 | -1.12 |
| ZNF587  | -1.74 | -2.32 | -2.16 | -1.07 |
| ZNF592  | -1.81 | -2.03 | -1.66 | -1.22 |
| ZNF652  | -3.07 | -3.59 | -3.73 | 1.04  |
| ZNF673  | -1.77 | -1.45 | -2.01 | 1.38  |
| ZNF701  | -1.59 | -1.62 | -2.76 | 1.71  |
| ZNF721  | -2.27 | -2.50 | -2.54 | 1.02  |
| ZNF828  | -1.93 | -2.15 | -1.58 | -1.36 |
| ZNF93   | -2.56 | -3.00 | -2.94 | -1.02 |
| ZSCAN16 | -1.97 | -1.92 | -2.53 | 1.32  |
| ZSCAN22 | -2.16 | -1.99 | -1.64 | -1.21 |
| ZXDC    | -1.85 | -2.07 | -1.74 | -1.19 |

|        |       |       |       |       |
|--------|-------|-------|-------|-------|
| ZYG11B | -4.87 | -5.95 | -4.25 | -1.40 |
|--------|-------|-------|-------|-------|
